# Supplementary material for: Octahedral iron(ii) phthalocyanine complexes: multinuclear NMR and relevance as NO2 chemical sensors
Source: Royal Society of Chemistry journal article supplement (doi:10.1039/b924429h), 2010-01-01
Supplement: b924429h.pdf [file b924429h.pdf]

## OCTAHEDRAL IRON (II) PHTHALOCYANINE COMPLEXES: MULTINUCLEAR NMR AND RELEVANCE AS NO<sub>2</sub> CHEMICAL SENSORS

Pascual Oña Burgos,<sup>†</sup> María Casimiro,<sup>†</sup> Ignacio Fernández<sup>†,\*</sup> Angel Valero Navarro,<sup>‡</sup> Jorge F. Fernández  
Sánchez,<sup>‡,\*</sup> Antonio Segura Carretero,<sup>‡</sup> Alberto Fernández Gutiérrez<sup>‡</sup>

<sup>†</sup> *Área de Química Orgánica, Universidad de Almería, Carretera de Sacramento s/n, 04120, Almería, Spain.*

<sup>‡</sup> *Department of Analytical Chemistry, University of Granada. Av. Fuentenueva s/n, 18071, Granada, Spain.*

### Contents:

- Figure 1. <sup>1</sup>H NMR (500.13 MHz) spectrum of **4** in THF-*d*<sub>8</sub>.
- Figure 2. <sup>13</sup>C NMR (125.7 MHz) spectrum of **4** in THF-*d*<sub>8</sub>.
- Figure 3. <sup>1</sup>H NMR (500.13 MHz) spectrum of **5** in THF-*d*<sub>8</sub>.
- Figure 4. <sup>13</sup>C NMR (125.7 MHz) spectrum of **5** in THF-*d*<sub>8</sub>.
- Figure 5. <sup>1</sup>H NMR (500.13 MHz) spectrum of **6** in THF-*d*<sub>8</sub>.
- Figure 6. <sup>31</sup>P NMR (202.4 MHz) spectrum of **6** in THF-*d*<sub>8</sub>.
- Figure 7. <sup>1</sup>H, <sup>15</sup>N gHMQC NMR spectrum of **6** in THF-*d*<sub>8</sub>.
- Figure 8. <sup>31</sup>P, <sup>57</sup>Fe HMQC NMR spectrum of **6** in THF-*d*<sub>8</sub>.
- Figure 9. <sup>1</sup>H NMR (500.13 MHz) spectrum of **7** in THF-*d*<sub>8</sub>.
- Figure 10. <sup>31</sup>P NMR (202.4 MHz) spectrum of **7** in THF-*d*<sub>8</sub>.
- Figure 11. <sup>13</sup>C NMR (75.5 MHz) spectrum of **7** in THF-*d*<sub>8</sub>.
- Figure 12. <sup>1</sup>H, <sup>15</sup>N gHMQC NMR spectrum of **7** in THF-*d*<sub>8</sub>.
- Figure 13. <sup>31</sup>P, <sup>57</sup>Fe HMQC NMR spectrum of **7** in THF-*d*<sub>8</sub>.
- Figure 14. Calibration curve for the NO<sub>2</sub>sensing film.
- Figure 15. Stability graphs as a function of time & temperature for sensing layers containing **4-5**.
- Figure 16. Stability graphs as a function of time & temperature for sensing layers containing **6-7**.
- Figure 17. <sup>1</sup>H NMR of the THF cocktail based on **1**:benzylamine in the ratio 1:30.
- Figure 18. <sup>1</sup>H NMR of the THF cocktail based on **1**:benzylamine:P(OEt)<sub>3</sub> in the ratio 1:30:15.
- Figure 19. Molecular absorption spectra for the THF cocktails for **2-5**.
- Figure 20. Molecular absorption spectra for the cocktails for **6** and **7**.
- Figure 21. Molecular absorption spectra for complex **7** in THF solution and incorporated into the film

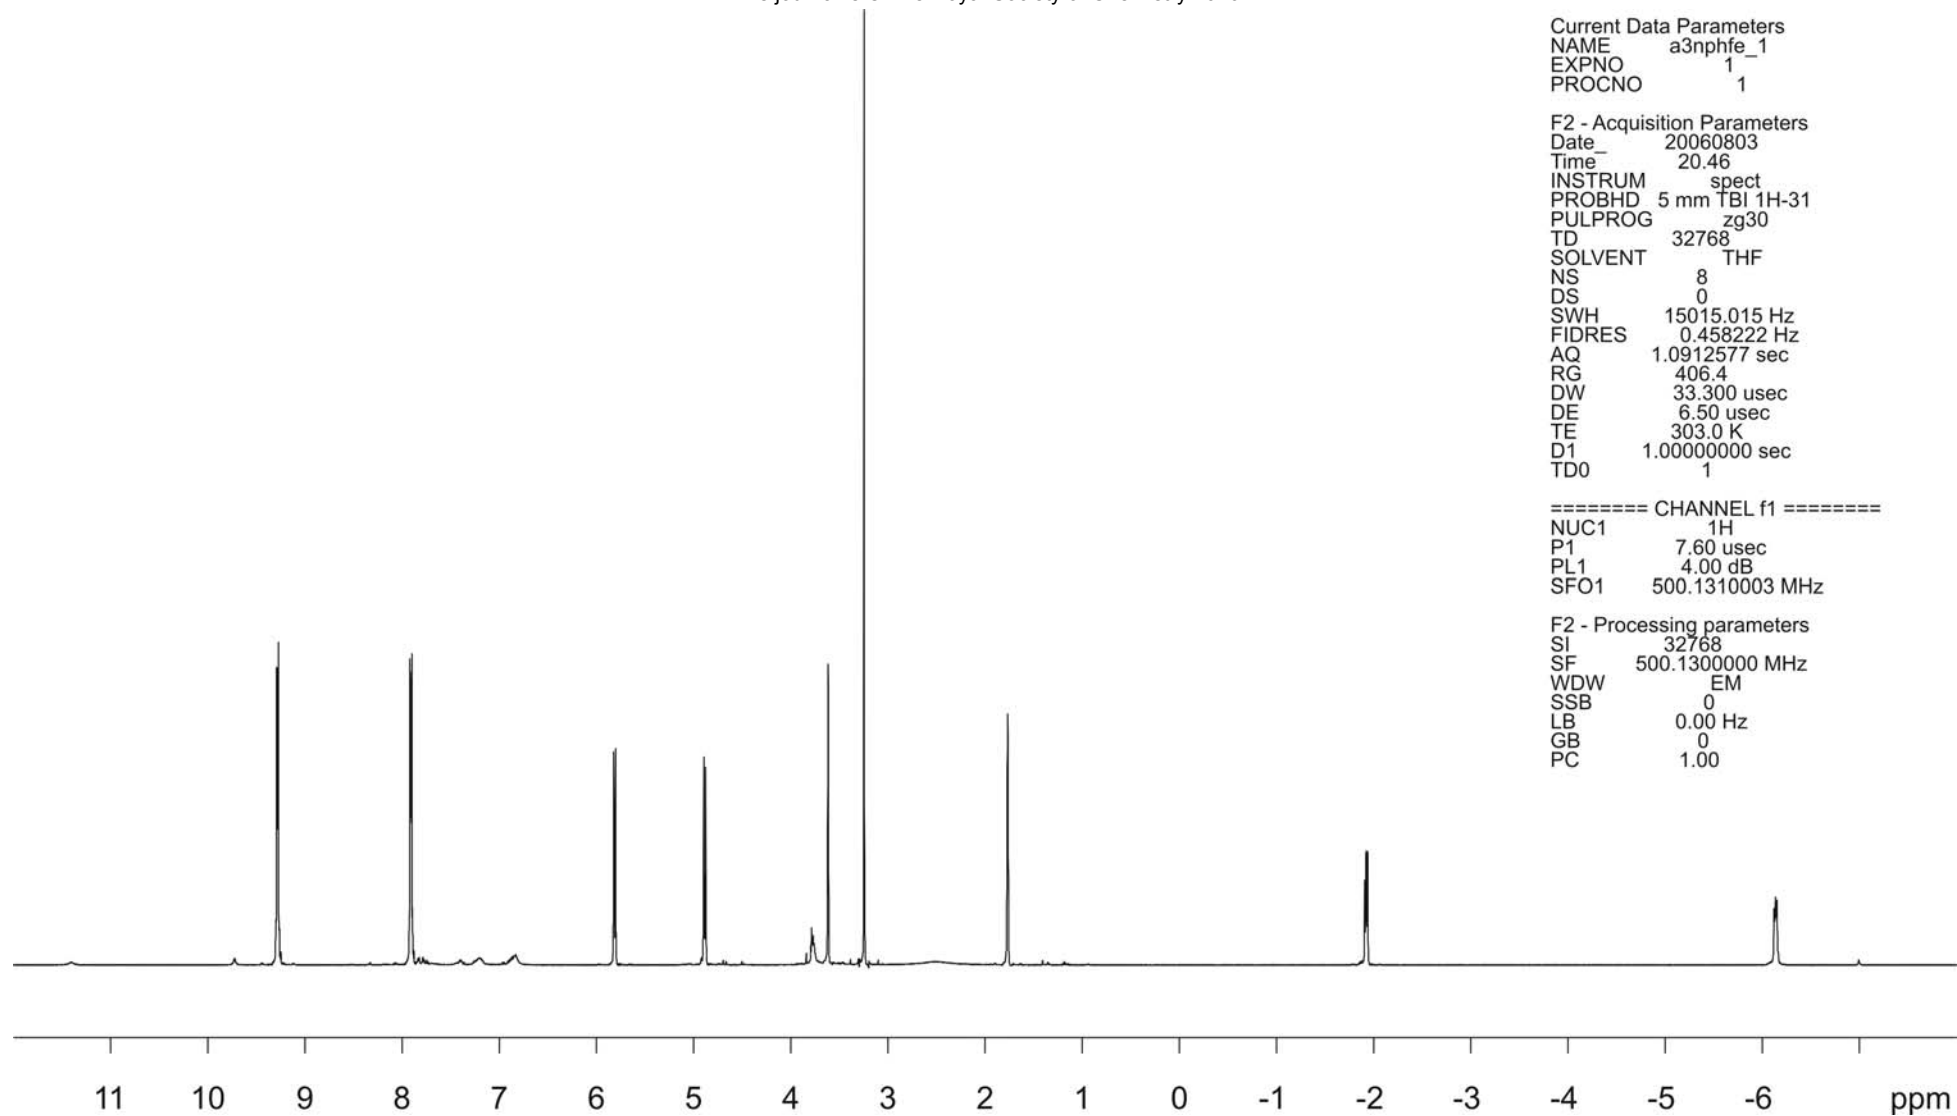

Figure 1.  $^1\text{H}$  NMR (500.13 MHz) spectrum of **4** in  $\text{THF-}d_8$ .

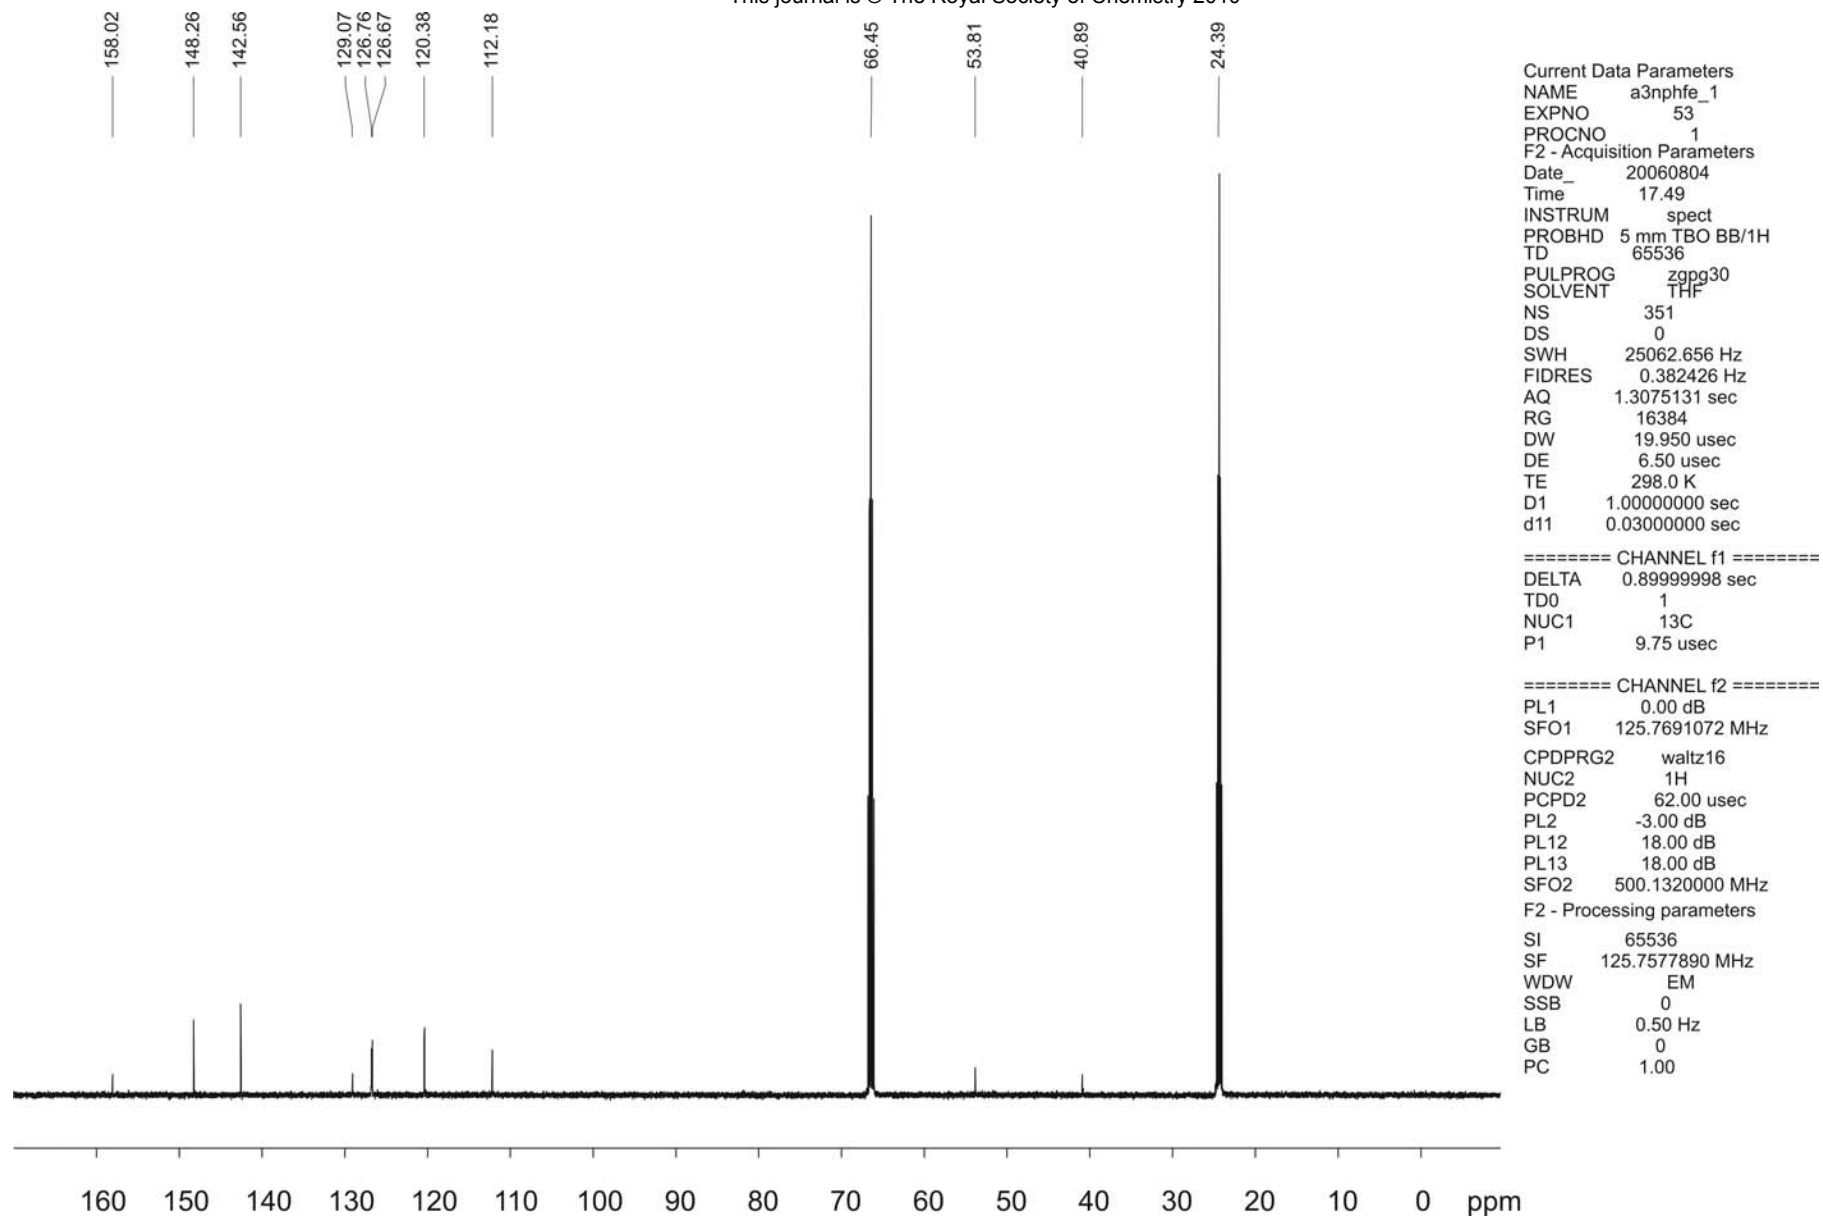

Figure 2.  $^{13}\text{C}$  NMR (125.7 MHz) spectrum of **4** in  $\text{THF-}d_8$ .

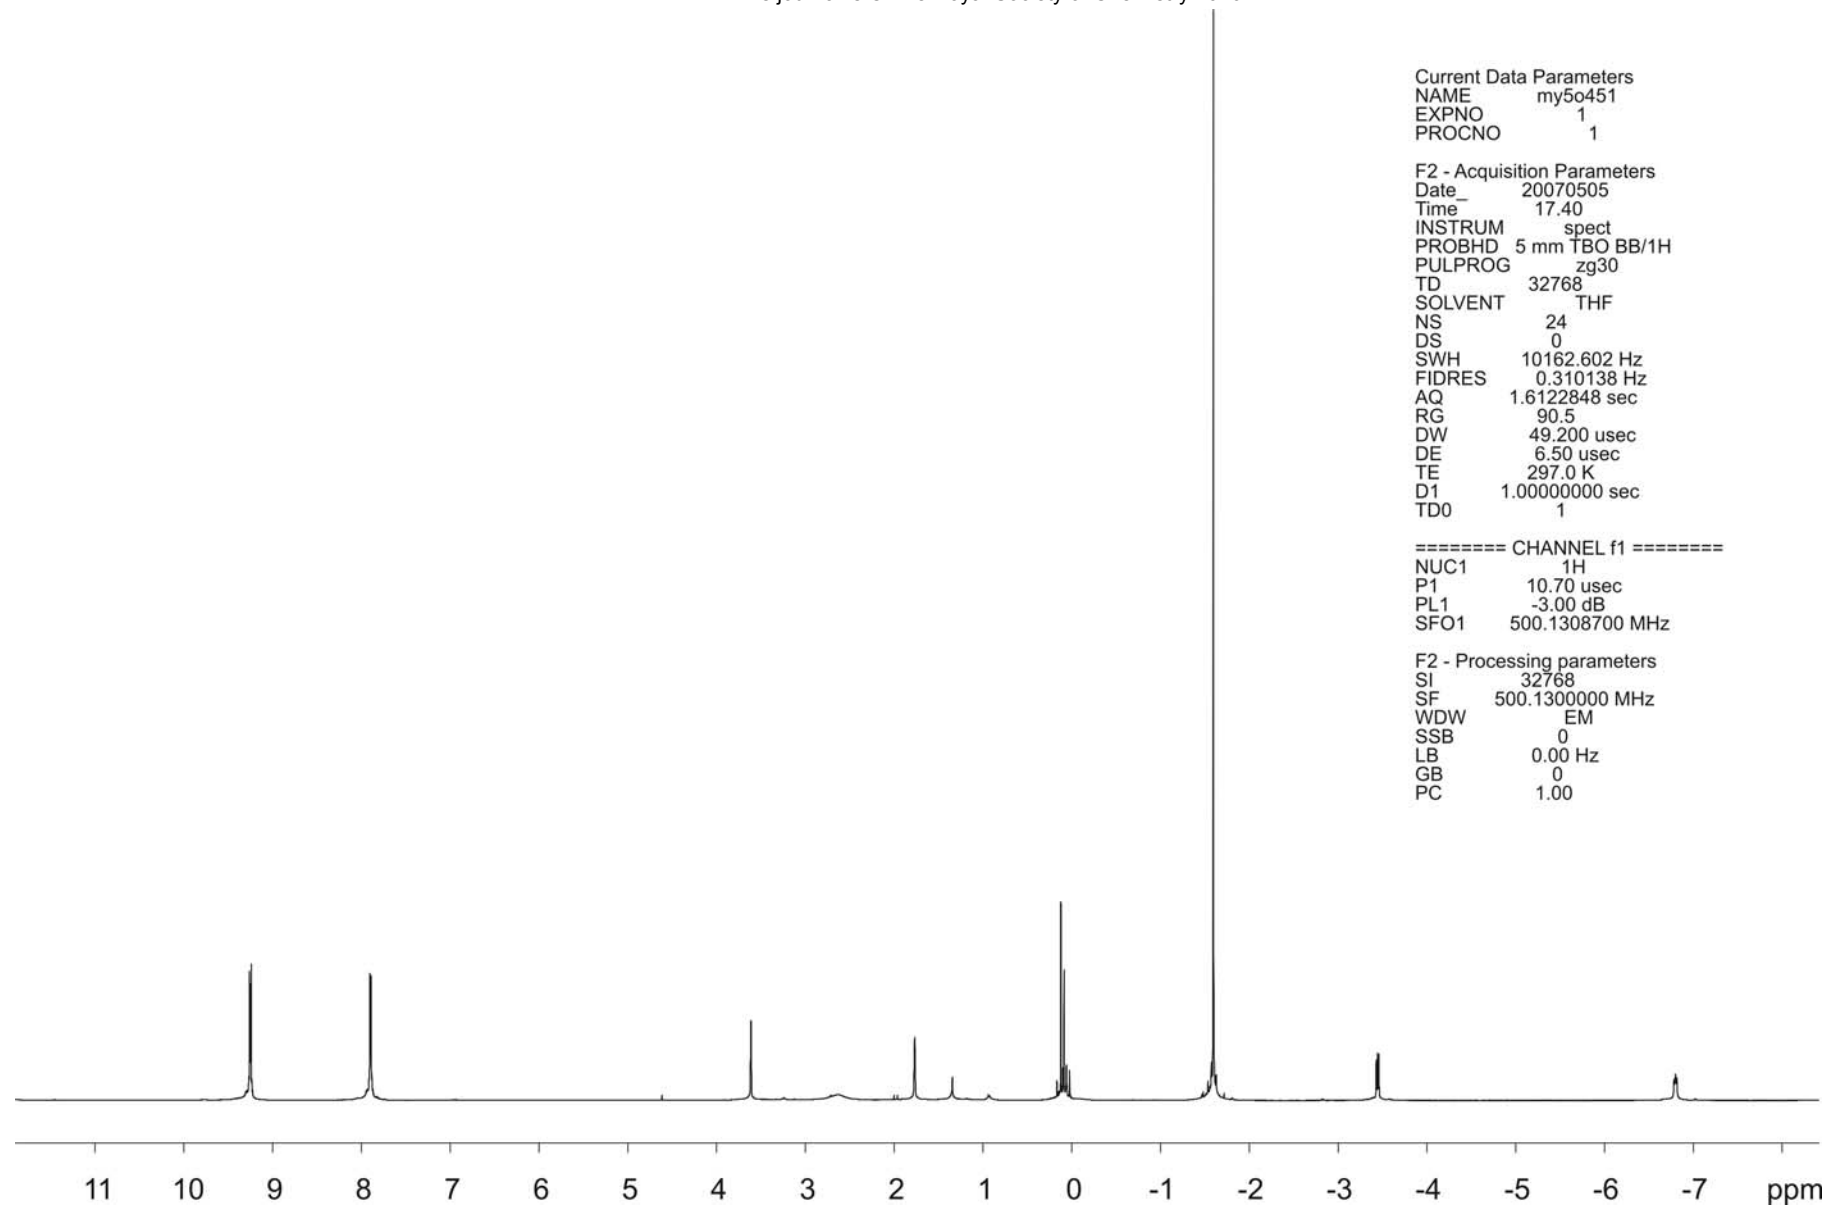

Figure 3.  $^1\text{H}$  NMR (500.13 MHz) spectrum of **5** in  $\text{THF-}d_8$ .

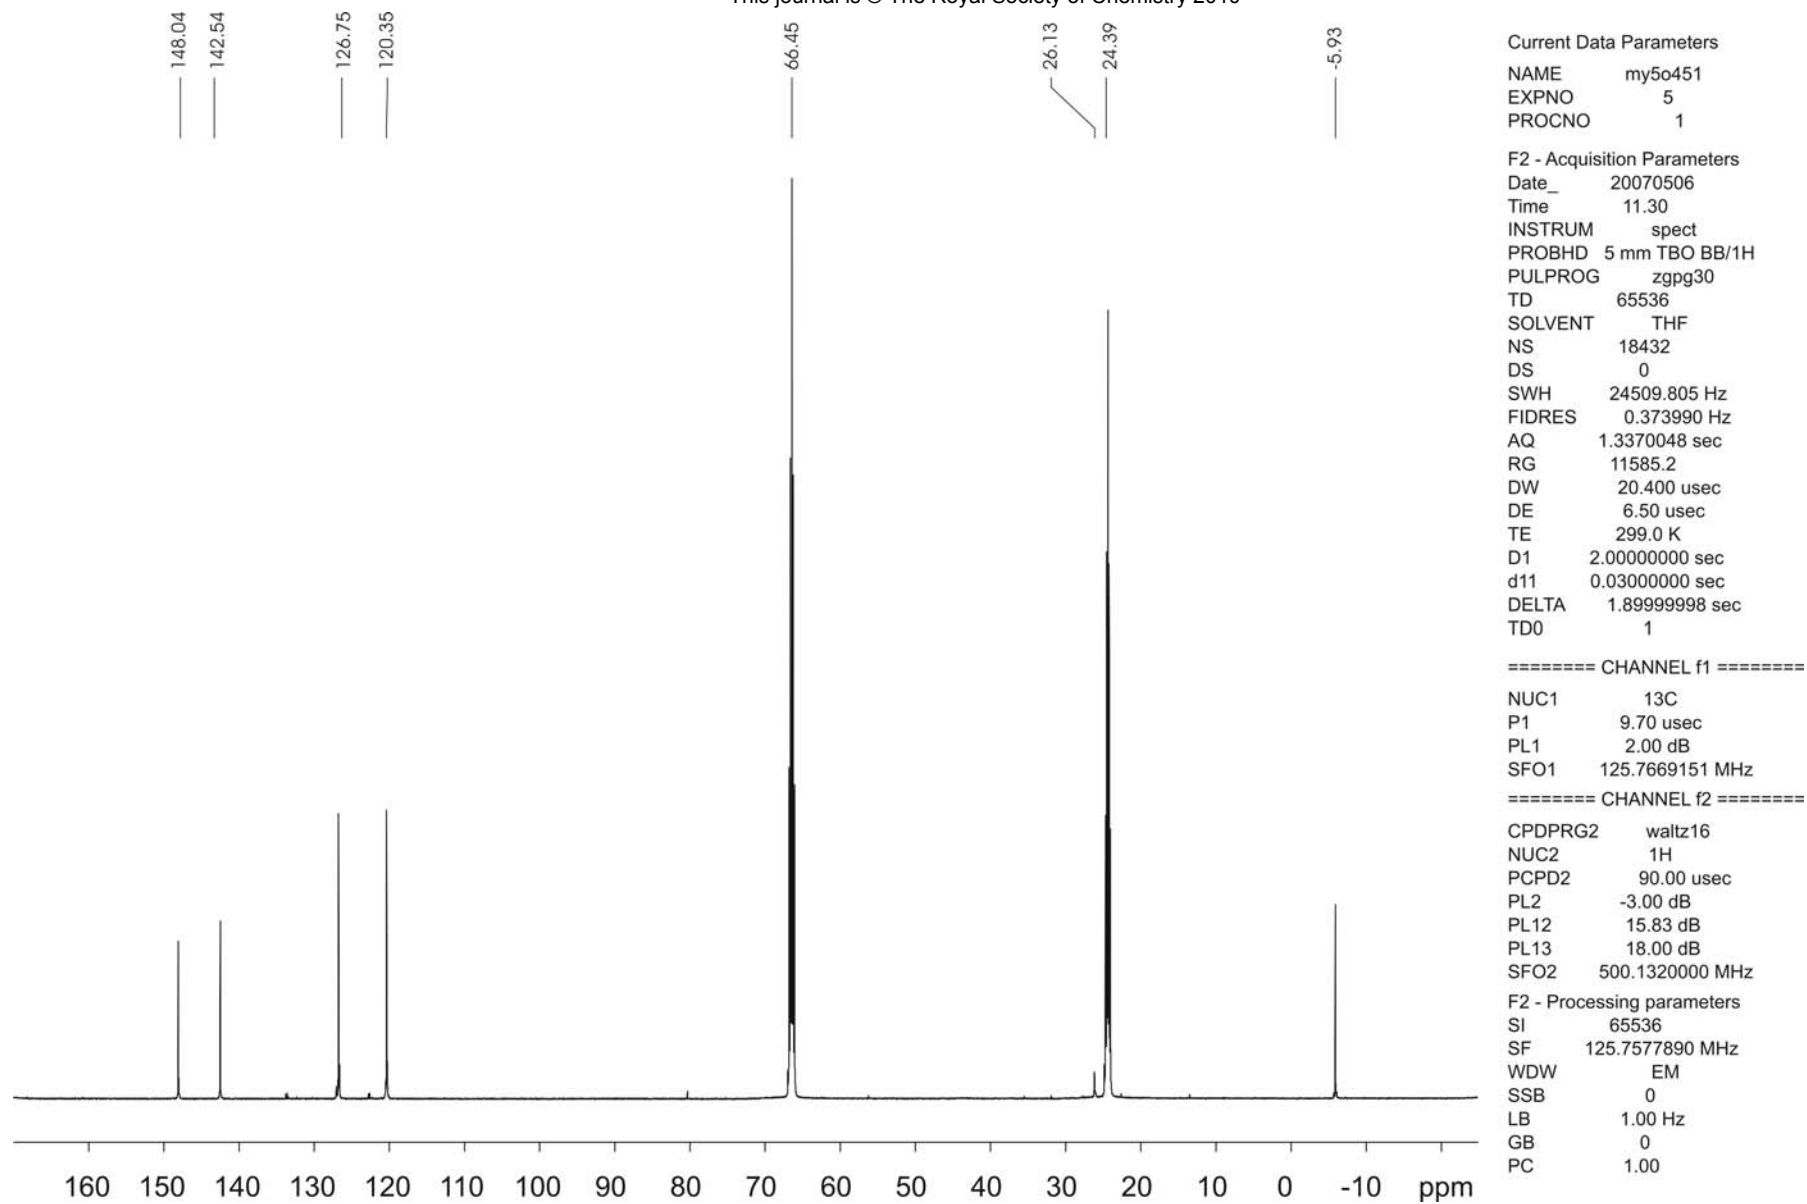

Figure 4.  $^{13}\text{C}$  NMR (125.7 MHz) spectrum of **5** in  $\text{THF-}d_8$ .

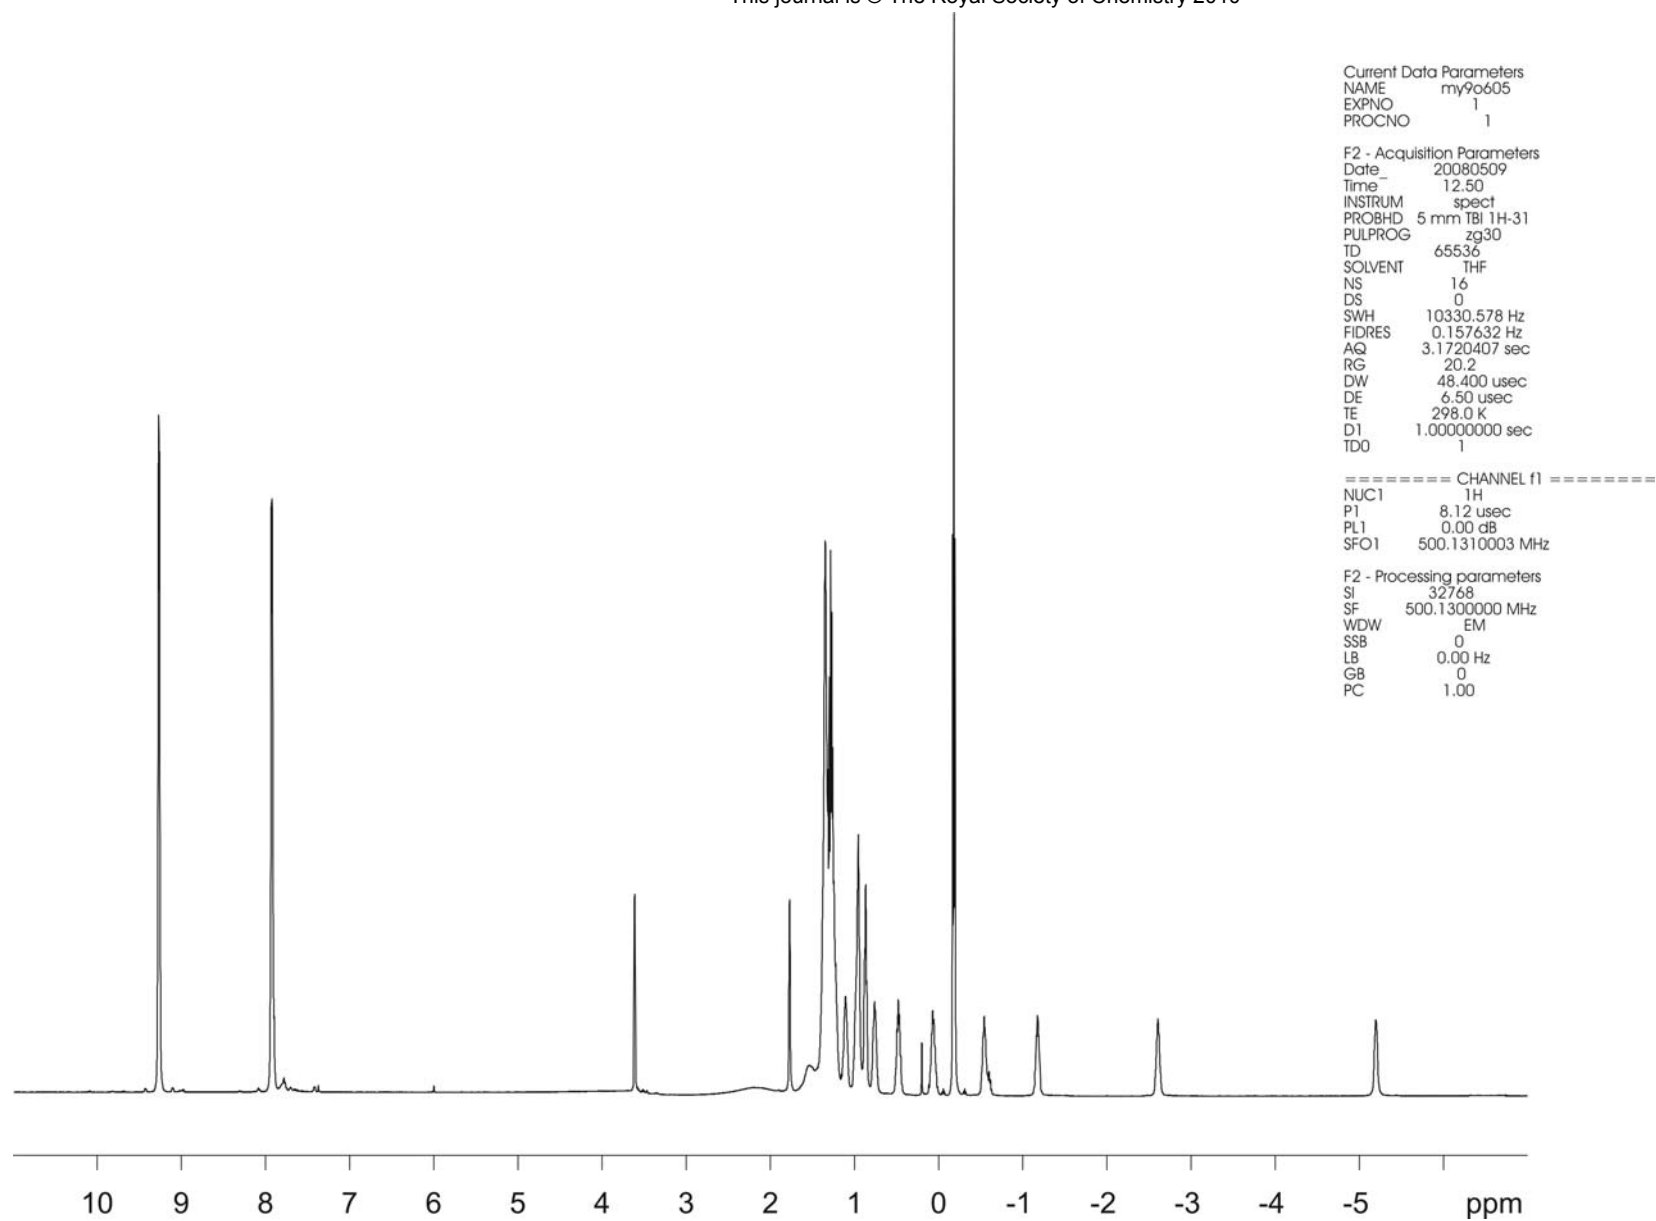

Figure 5.  $^1\text{H}$  NMR (500.13 MHz) spectrum of **6** in  $\text{THF-}d_8$ .

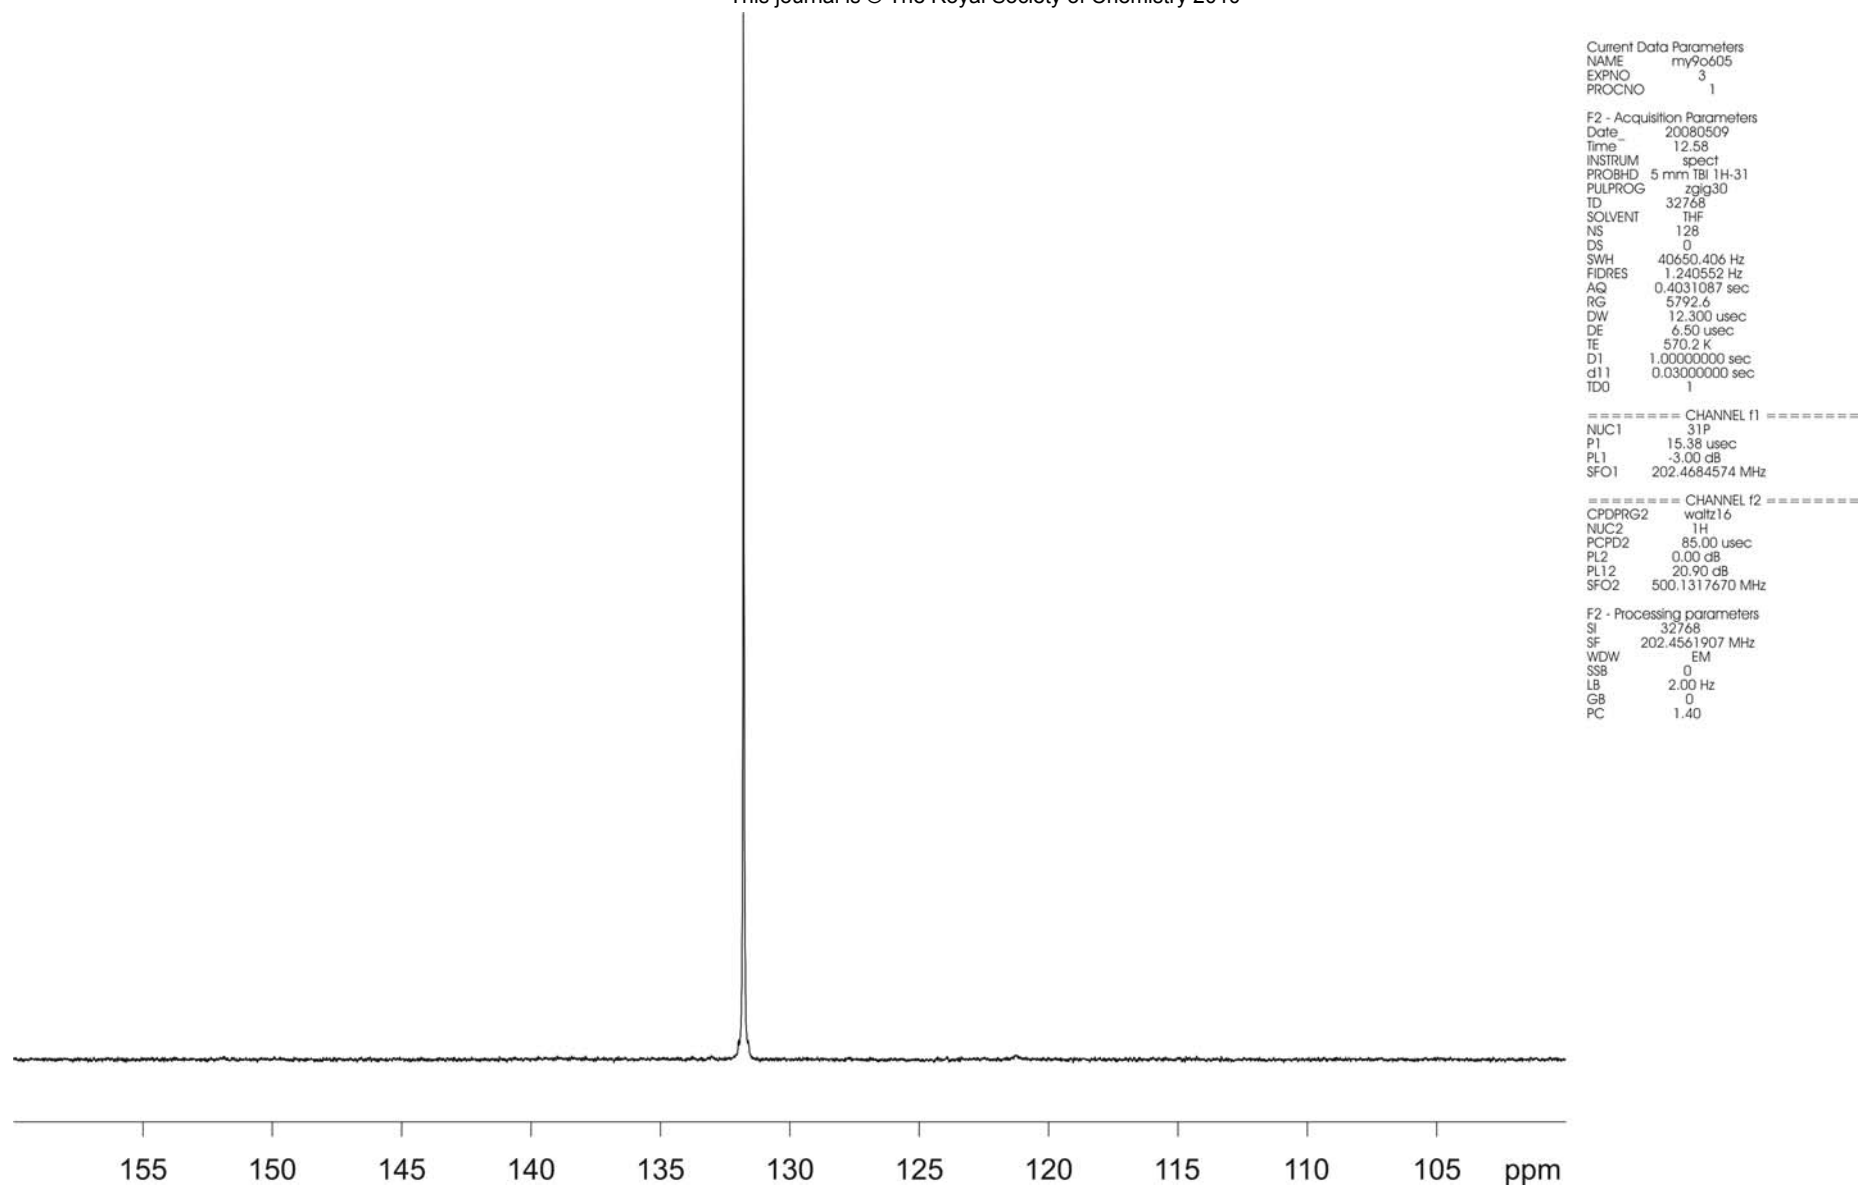

Figure 6.  $^{31}\text{P}$  NMR (202.4 MHz) spectrum of **6** in THF- $d_8$ .

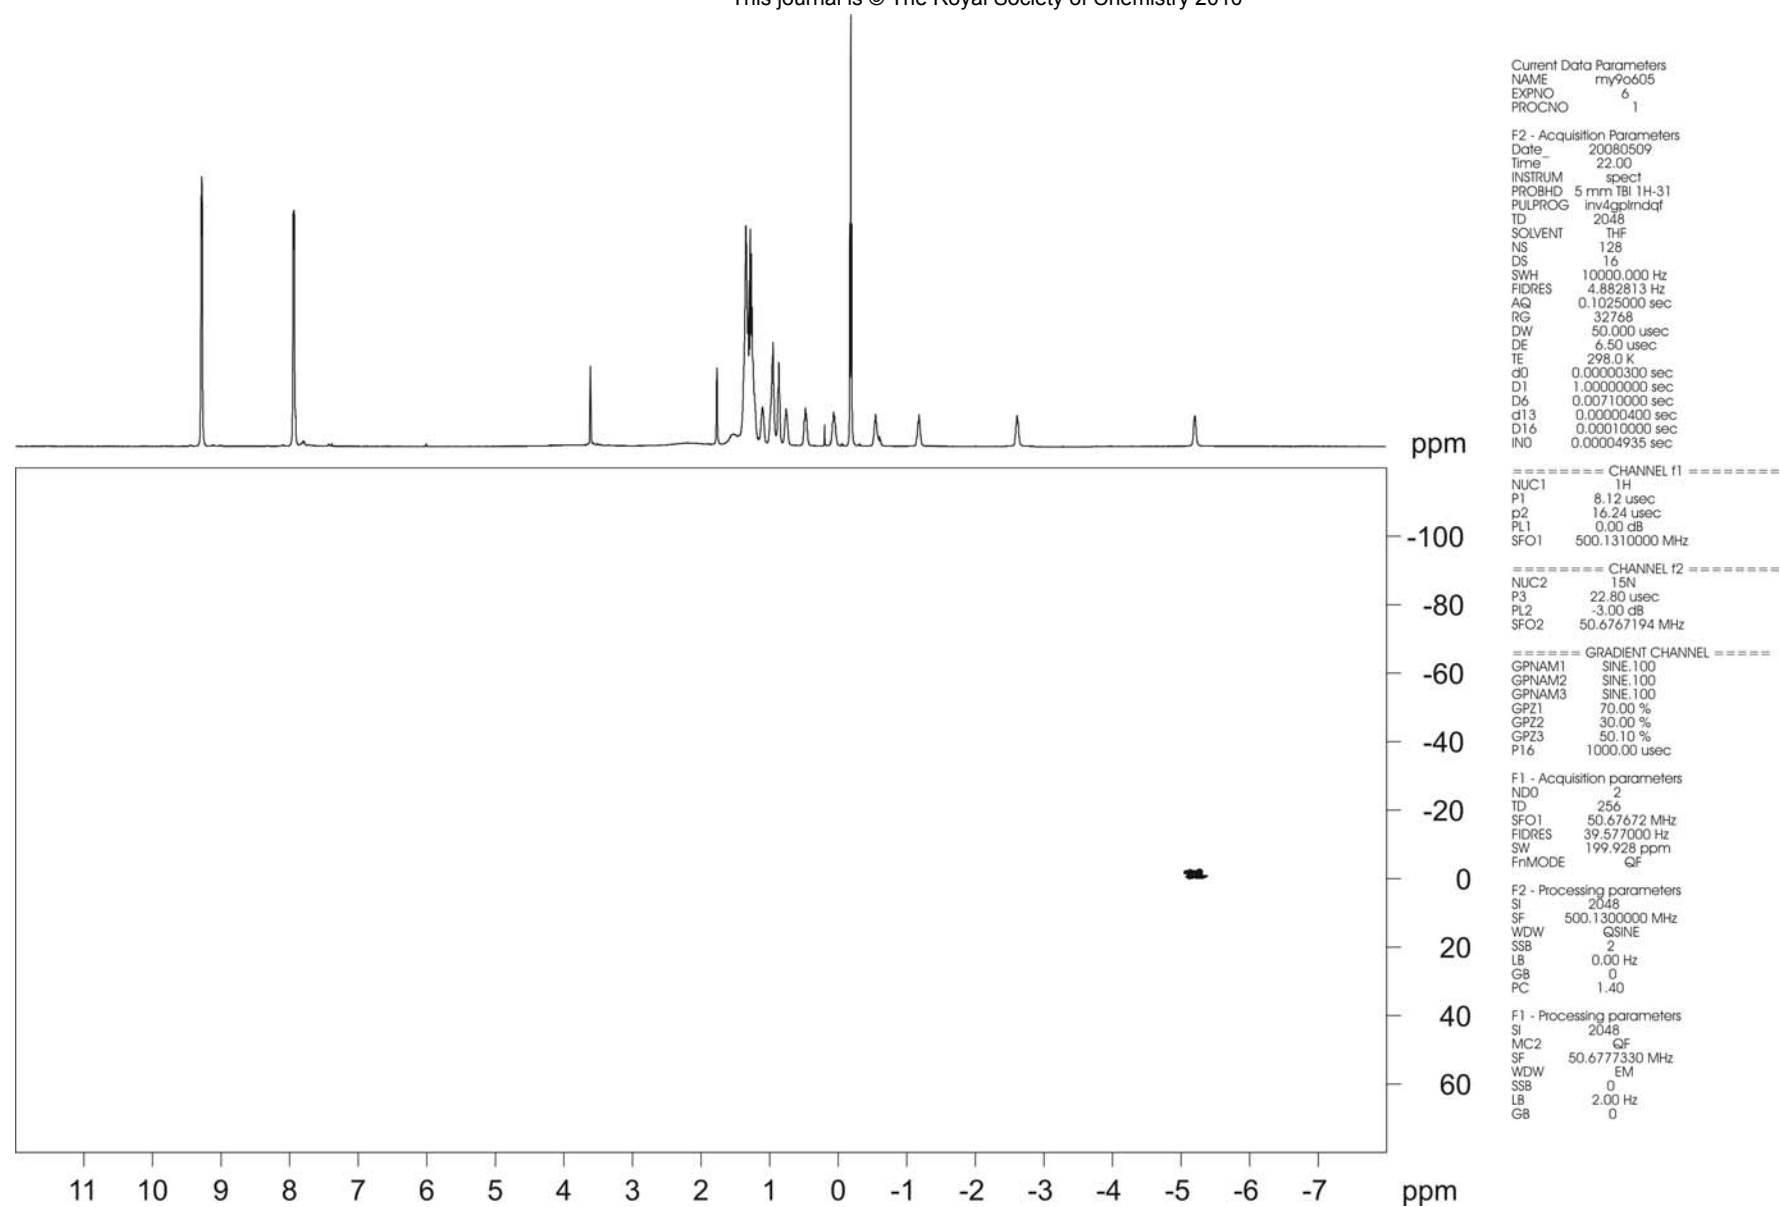

Figure 7.  $^1\text{H}$ ,  $^{15}\text{N}$  gHMQC NMR spectrum of **6** in  $\text{THF-}d_8$ .



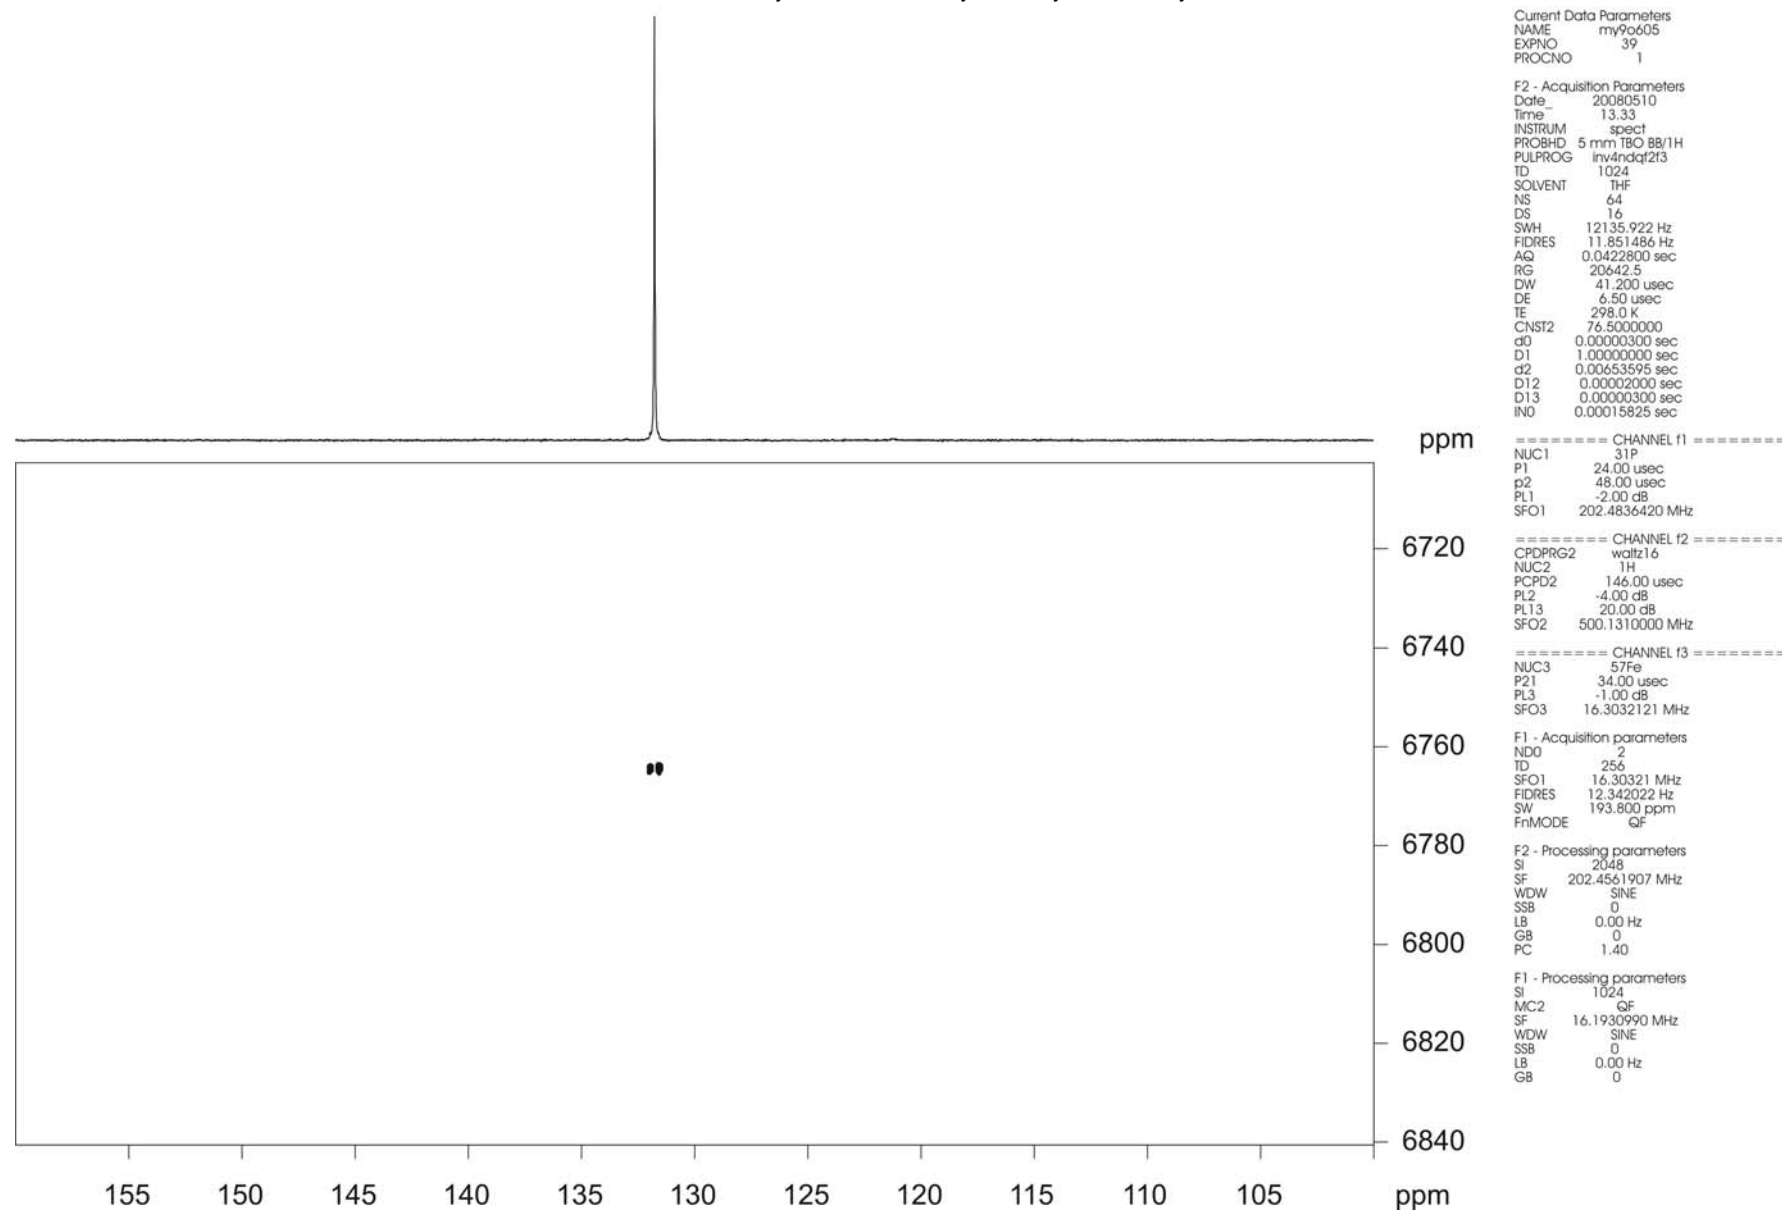

Figure 8.  $^{31}\text{P}$ ,  $^{57}\text{Fe}$  HMQC NMR spectrum of **6** in  $\text{THF-}d_8$ .

Current Data Parameters  
NAME my11o606  
EXPNO 1  
PROCNO 1

F2 - Acquisition Parameters  
Date\_ 20080511  
Time 11.13  
INSTRUM spect  
PROBHD 5 mm TBO BB/1H  
PULPROG zg30  
TD 65536  
SOLVENT THF  
NS 8  
DS 0  
SWH 10330.578 Hz  
FIDRES 0.157632 Hz  
AQ 3.1720407 sec  
RG 6.3  
DW 48.400 usec  
DE 6.50 usec  
TE 298.0 K  
D1 1.00000000 sec  
TDO 1

==== CHANNEL f1 =====  
NUC1 1H  
P1 10.70 usec  
PL1 -3.00 dB  
SFO1 500.1310000 MHz

F2 - Processing parameters  
SI 32768  
SF 500.1300000 MHz  
WDW EM  
SSB 0  
LB 0.00 Hz  
GB 0  
PC 1.00

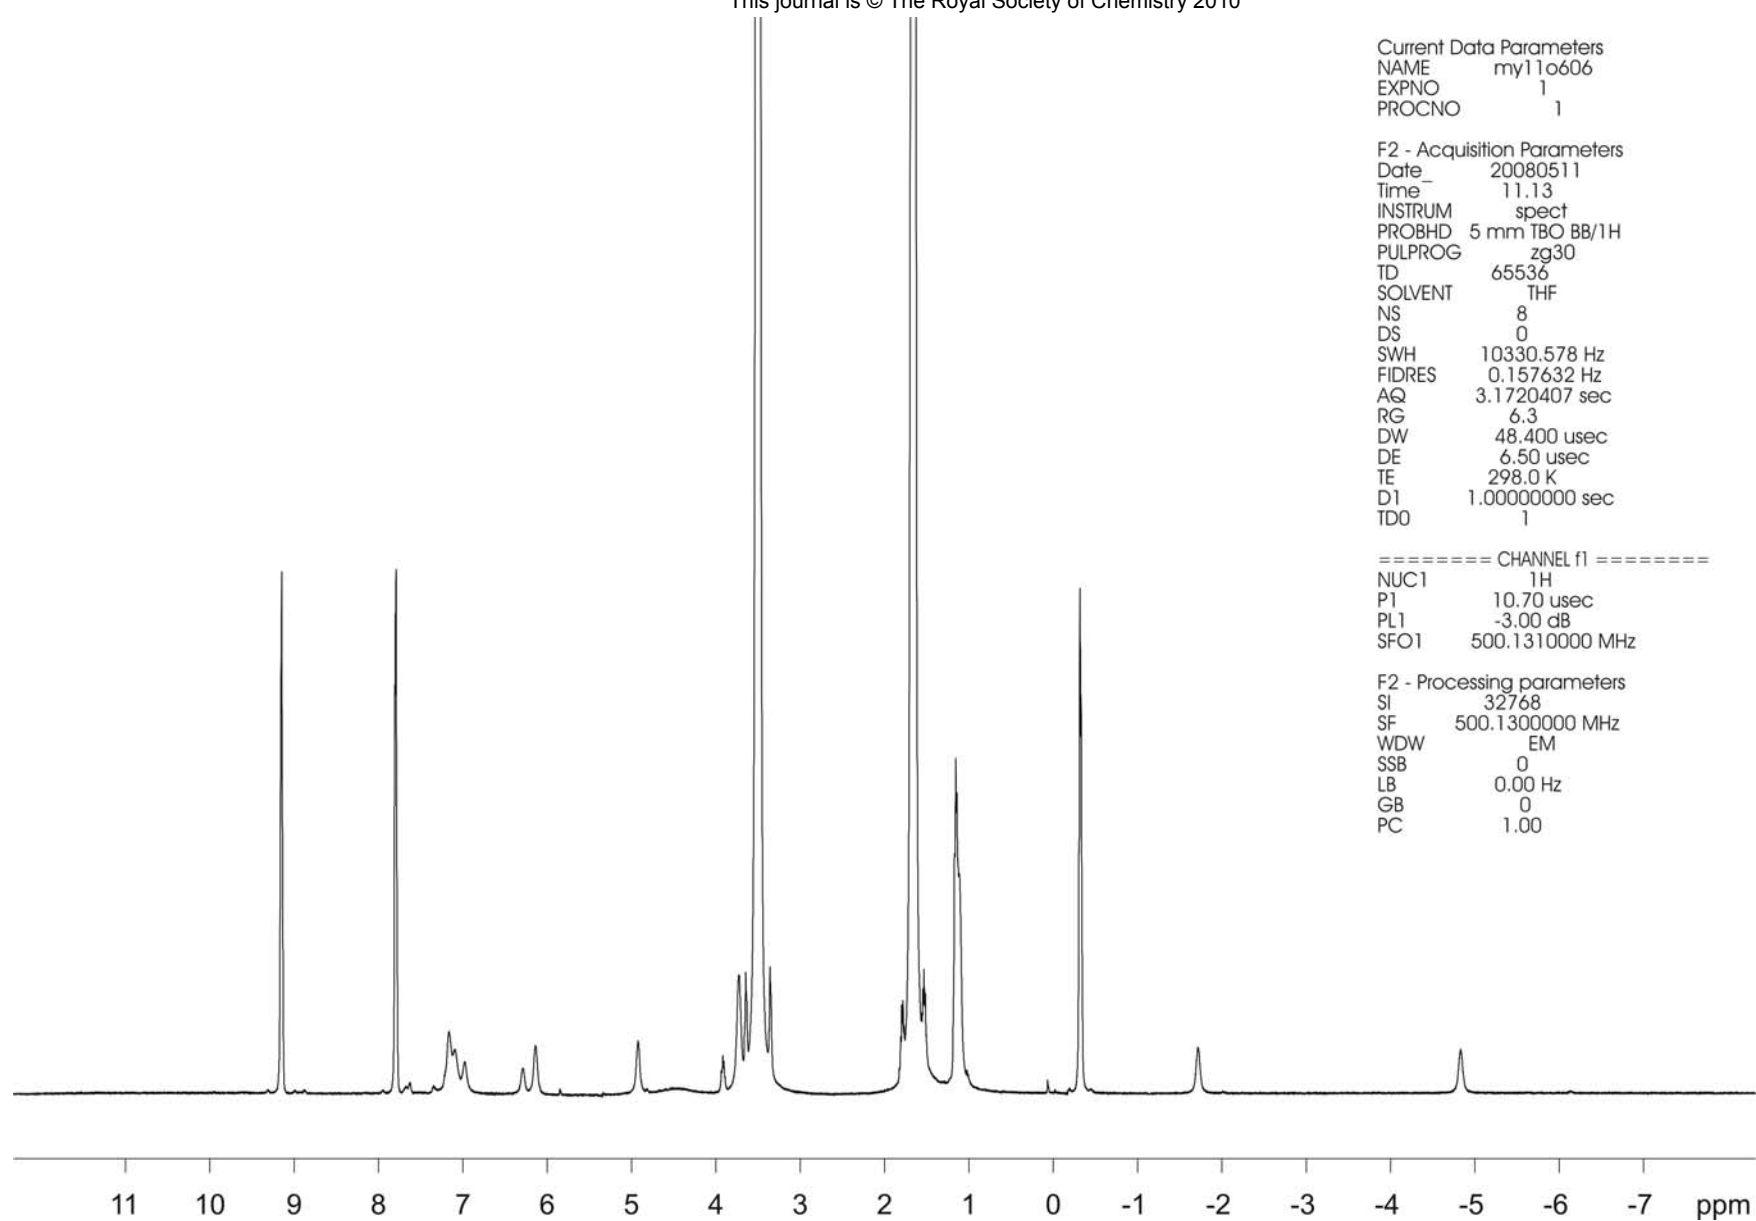

Figure 9.  $^1\text{H}$  NMR (500.13 MHz) spectrum of **7** in THF.

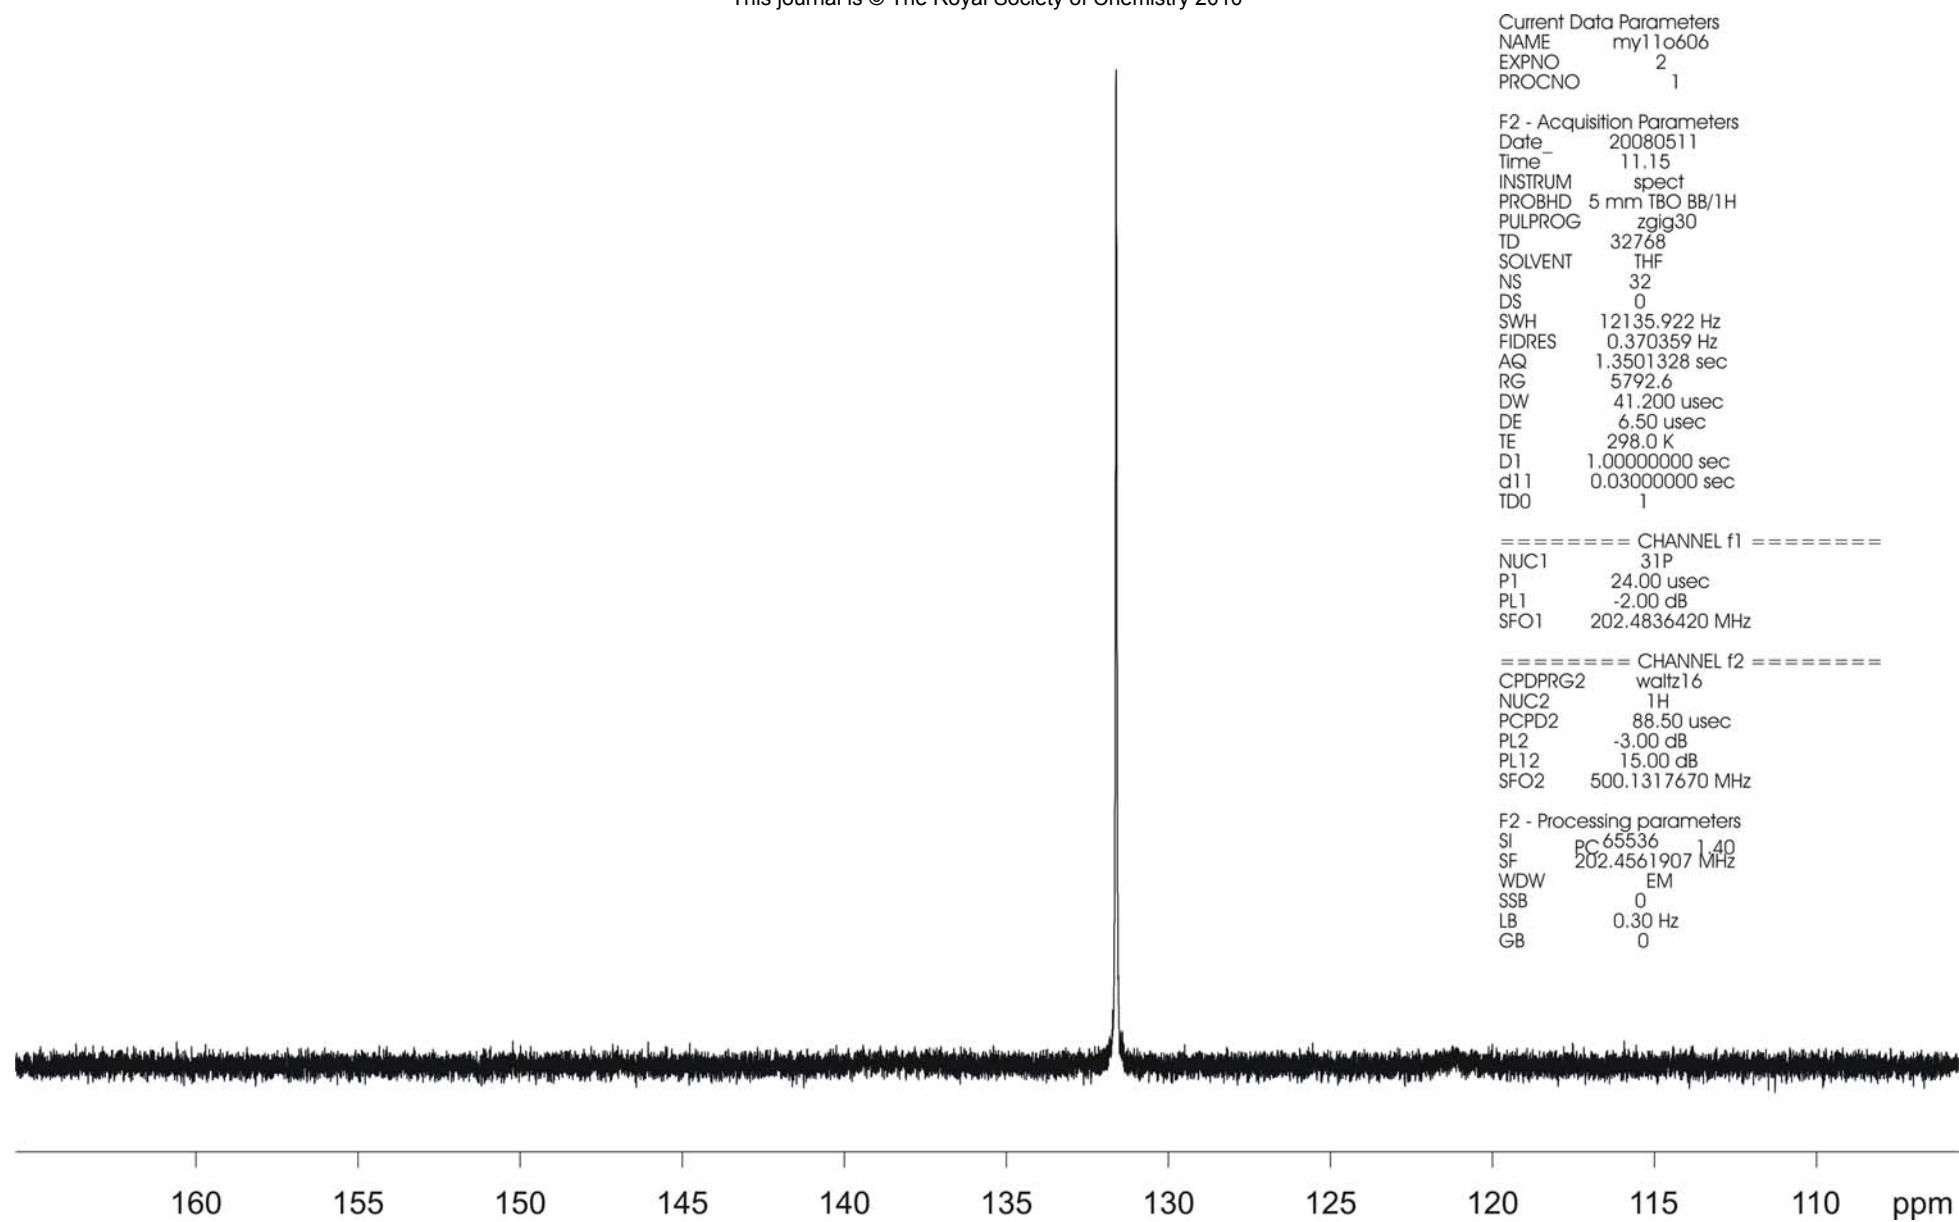

Figure 10.  $^{31}\text{P}$  NMR (202.4 MHz) spectrum of **7** in THF.

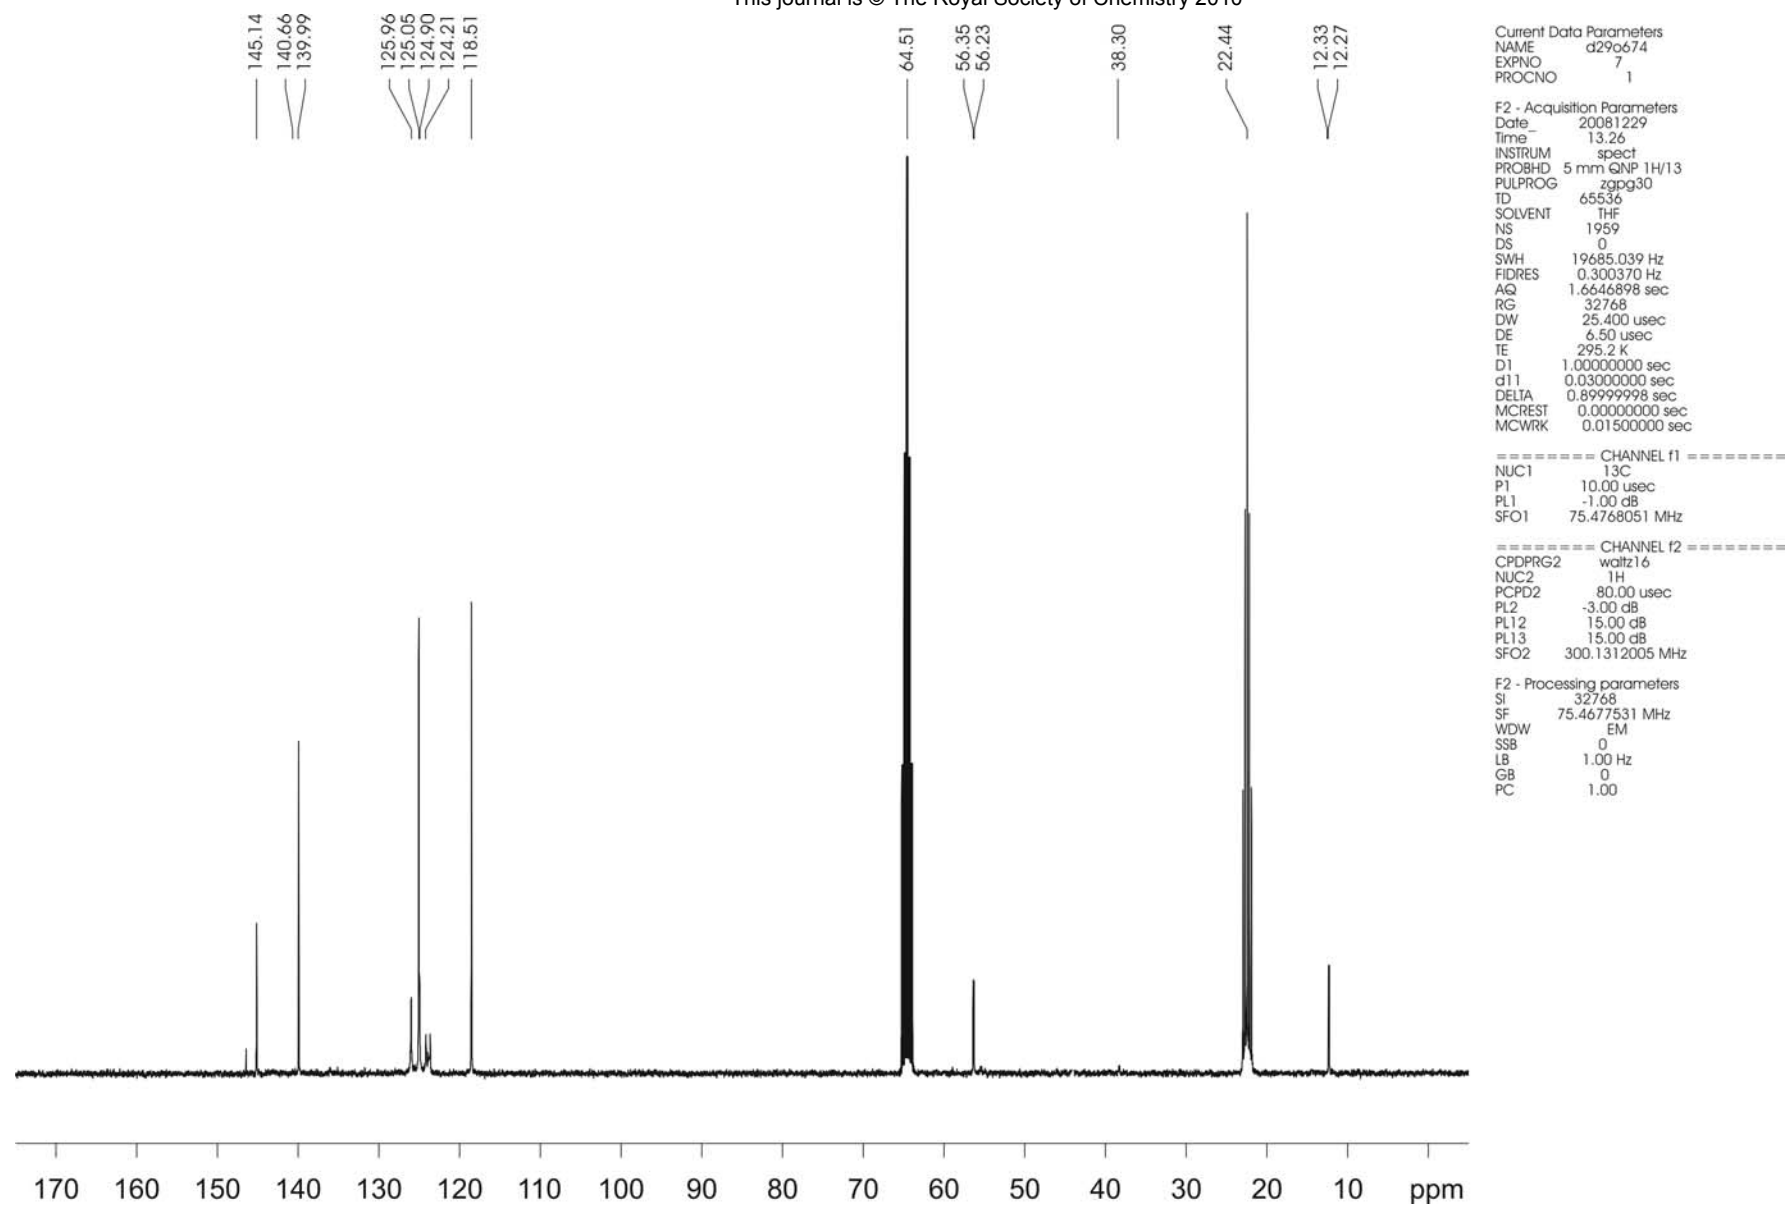

Figure 11.  $^{13}\text{C}$  NMR (75.5 MHz) spectrum of **7** in  $\text{THF-}d_8$ .

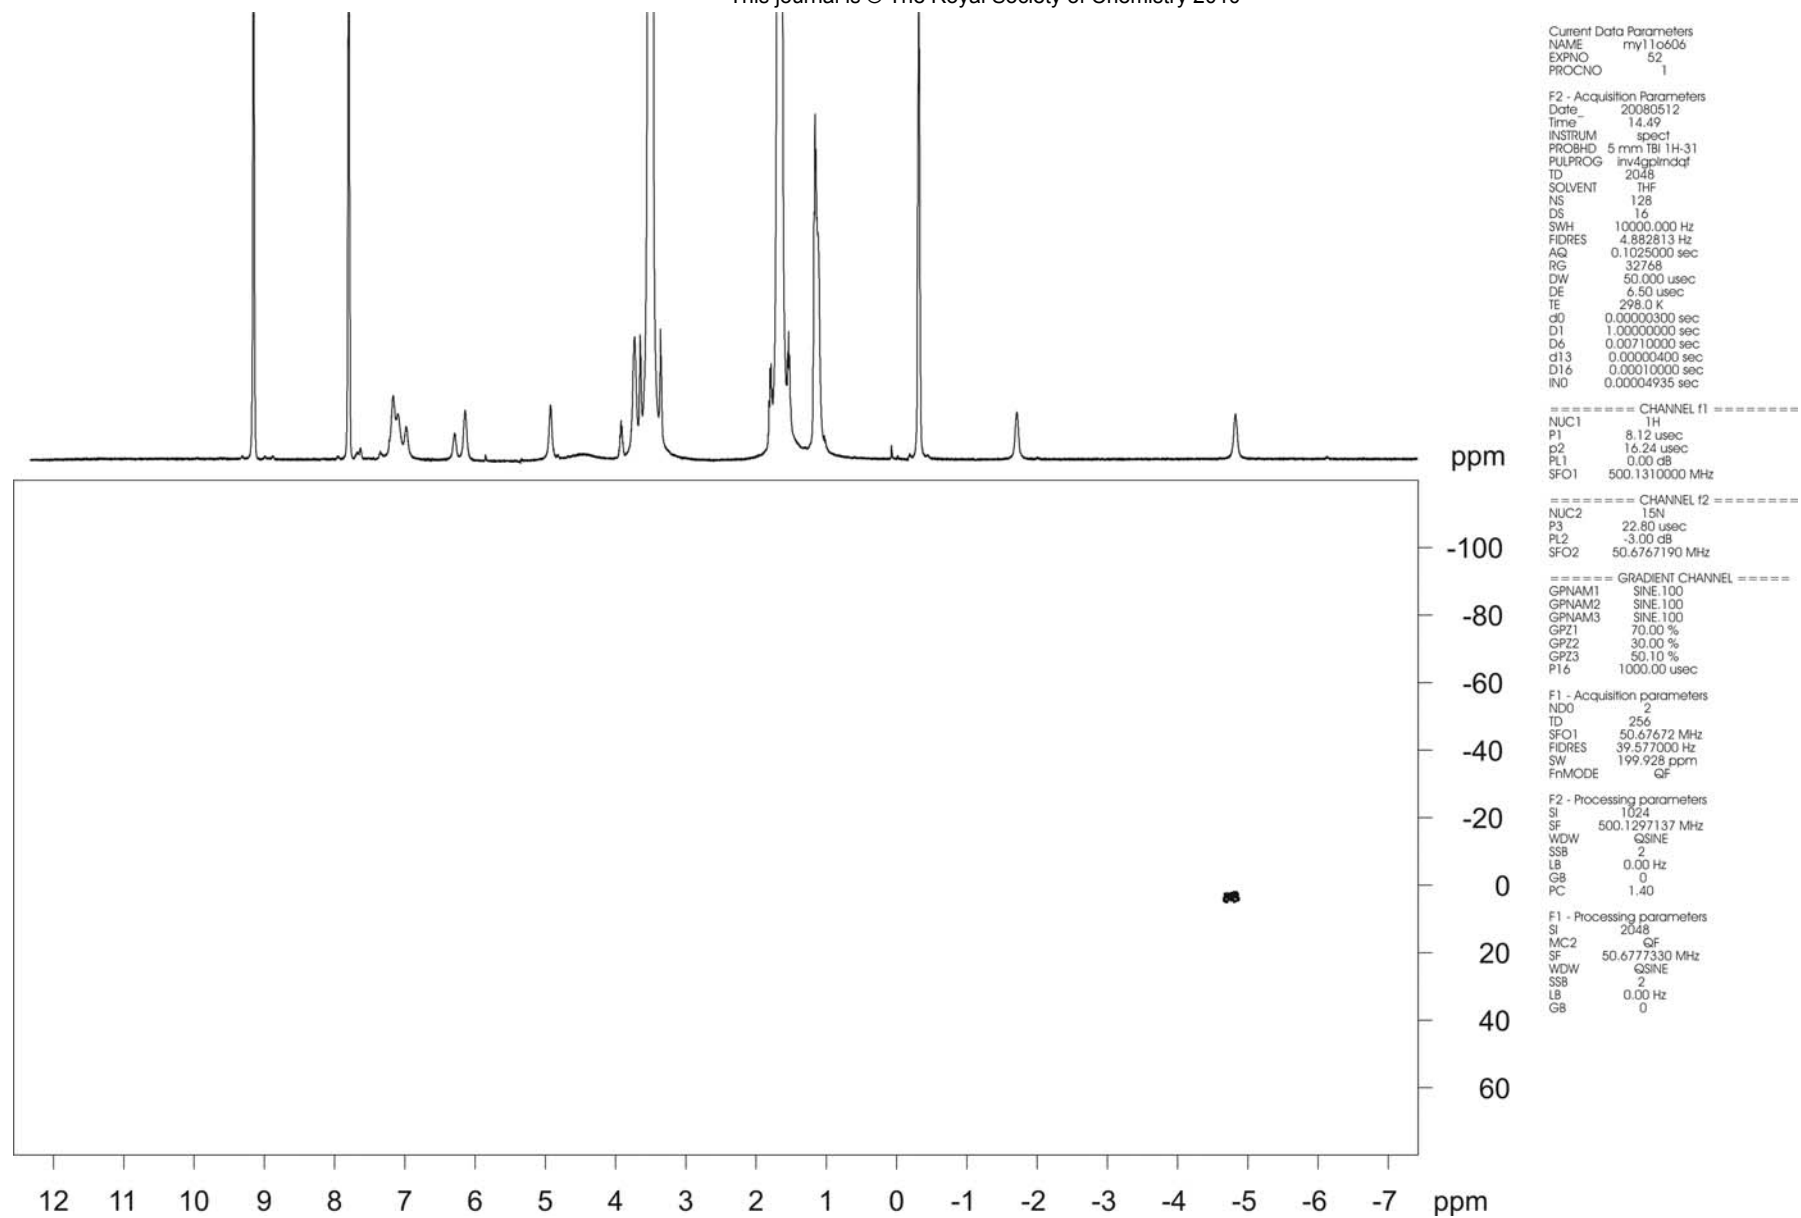

Figure 12.  $^1\text{H}$ ,  $^{15}\text{N}$  gHMQC NMR spectrum of **7** in THF.

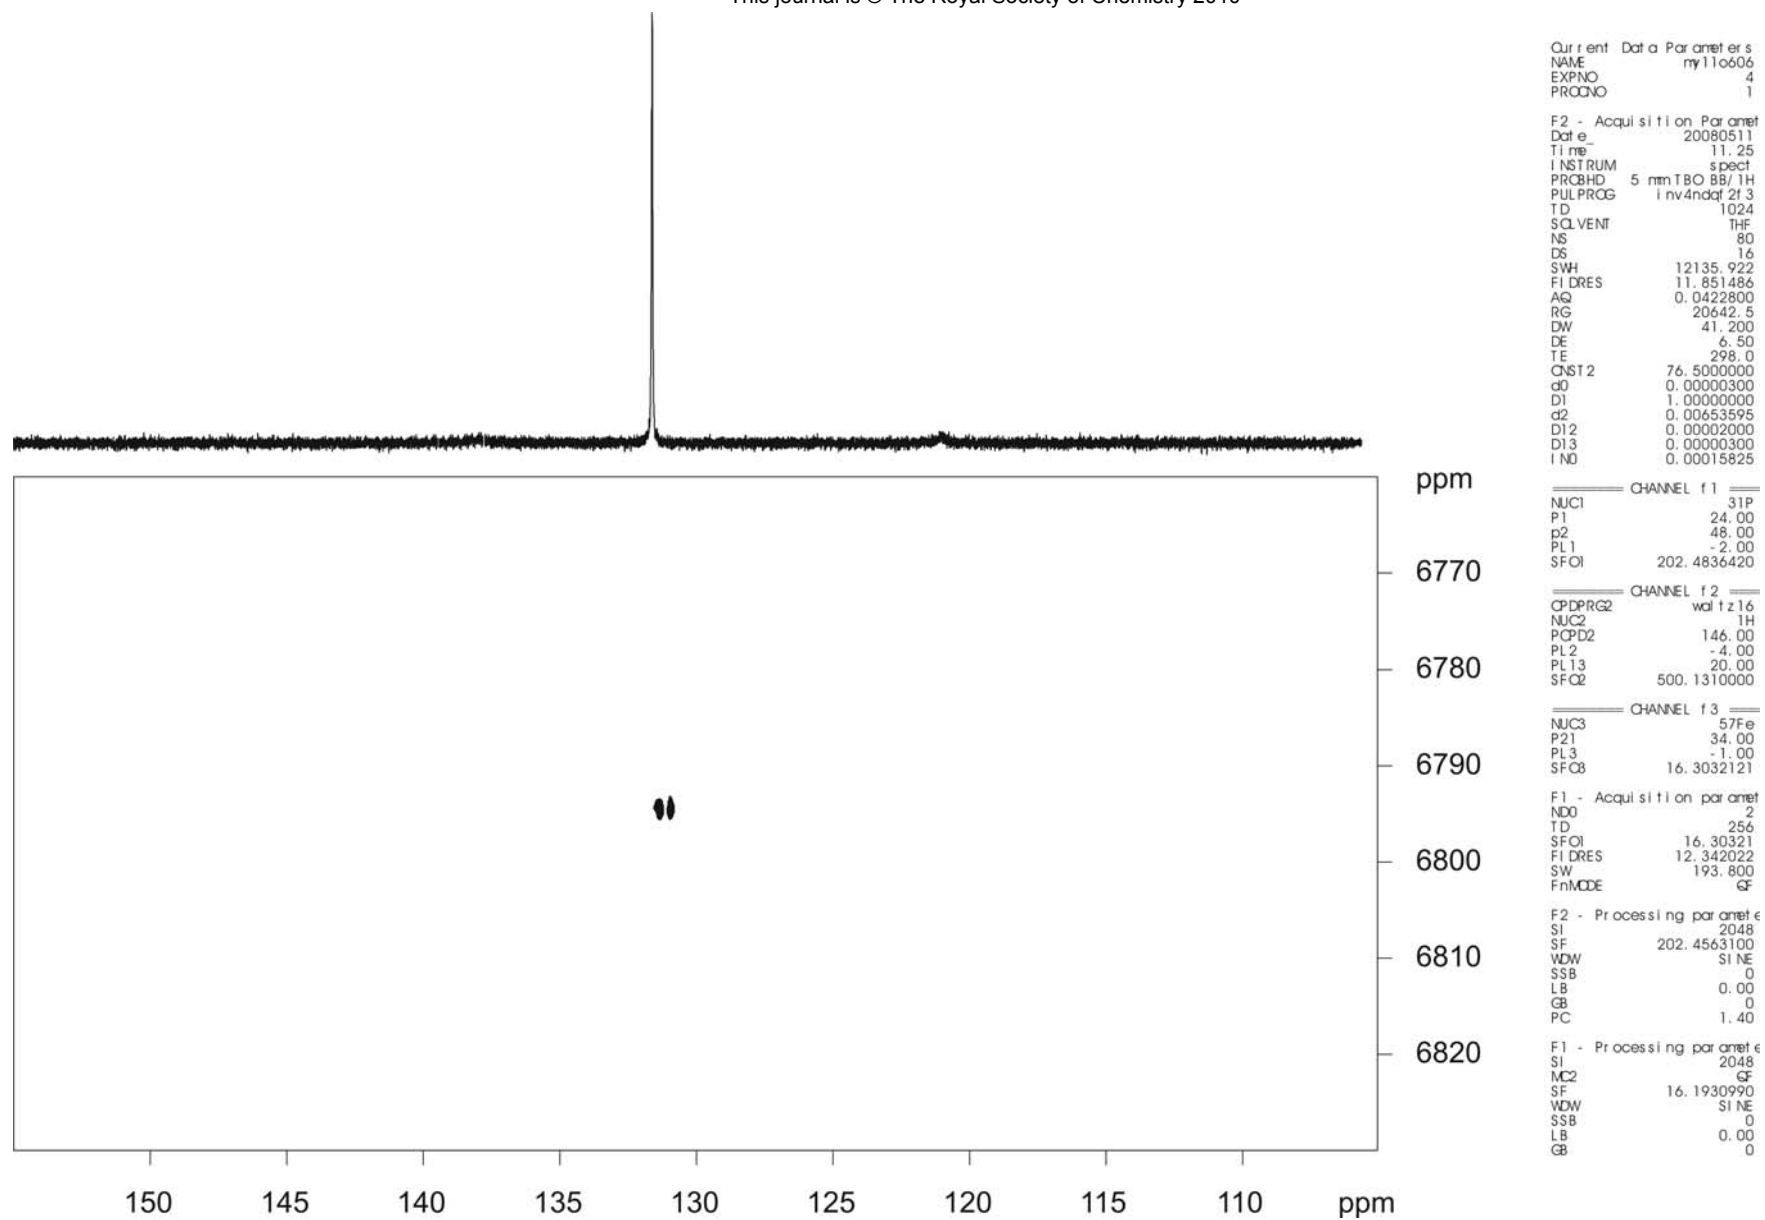

Figure 13.  $^{31}\text{P}$ ,  $^{57}\text{Fe}$  HMQC NMR spectrum of **7** in THF.

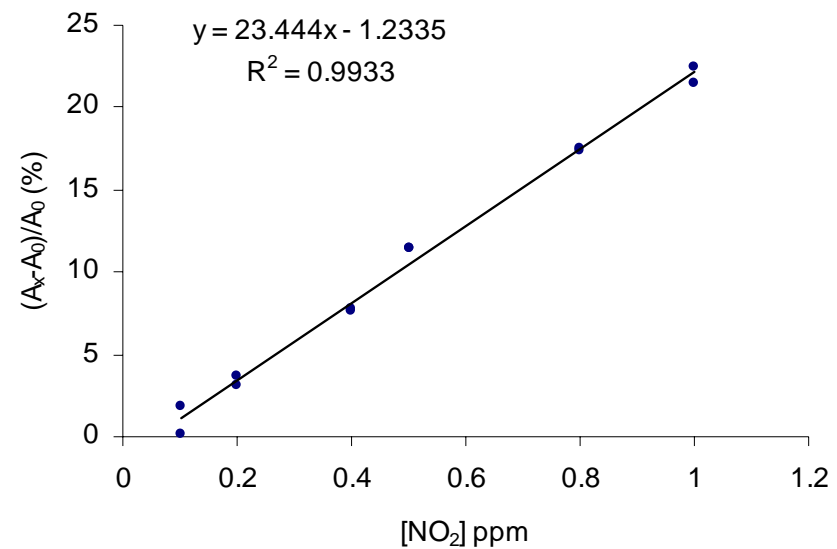

Figure 14. Calibration curve of complex 7 immobilized into AP200/19 for NO<sub>2</sub>; the calculated LOD is 1.2 ppb. A<sub>0</sub> is the absorbance before exposure to NO<sub>2</sub> and A<sub>x</sub> is the absorbance upon exposure to NO<sub>2</sub> for 300 s in air with 50% RH at a flow rate of 200 mL min<sup>-1</sup>.

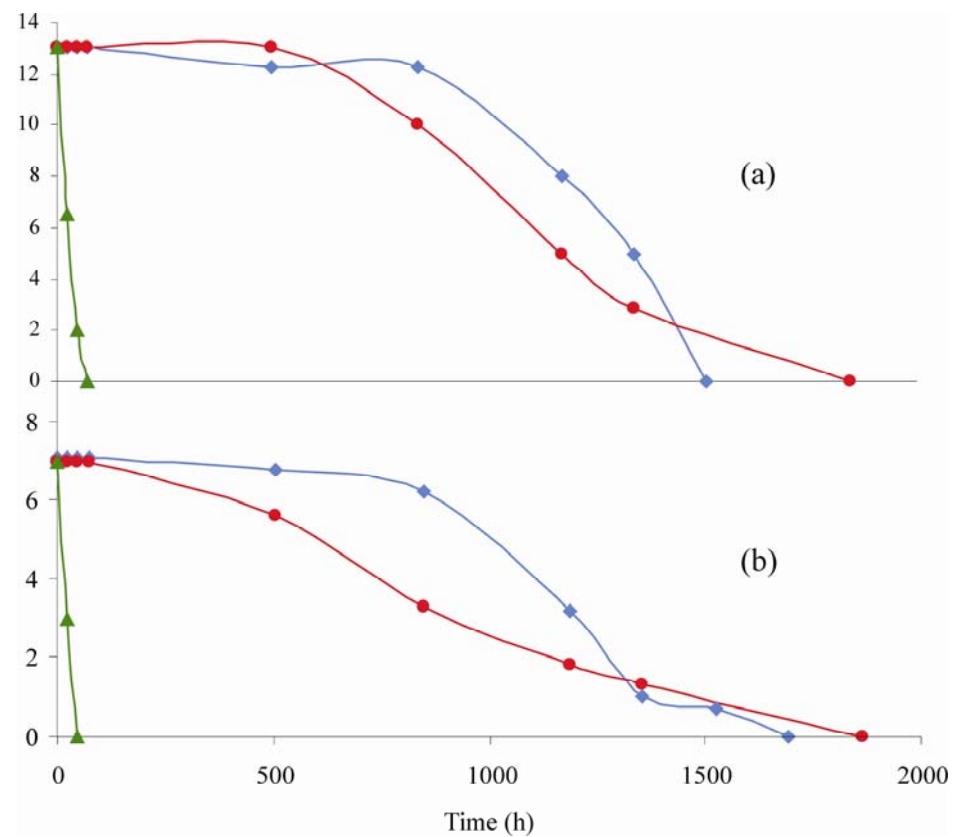

Figure 15. Stability studies at (♦) 4°C, (●) 25°C and (▲) 60°C for sensing layers containing a) complex 4, and b) complex 5, incorporated into AP200/19.  $A_0$  is the absorbance before exposure to  $\text{NO}_2$  and  $A_x$  is the absorbance upon exposure to  $\text{NO}_2$  for 300 s in air with 50% RH.



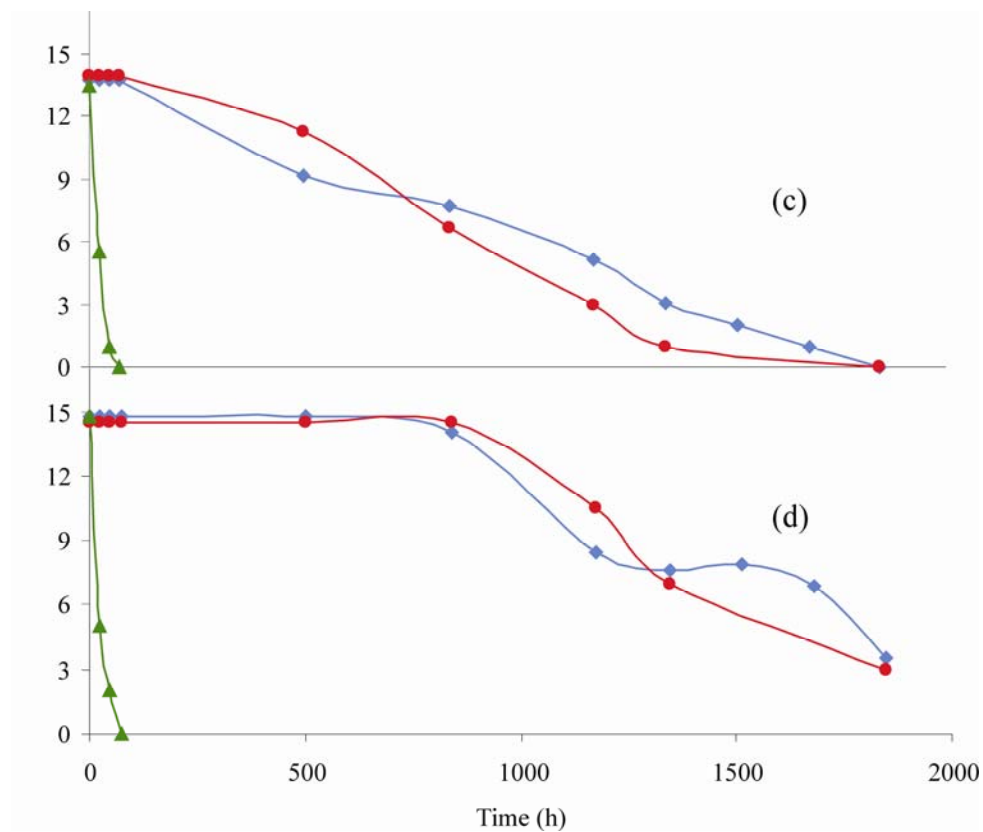

Figure 16. Stability studies at (◆) 4°C, (●) 25°C and (▲) 60°C for sensing layers containing a) complex 6, and b) complex 7, incorporated into AP200/19.  $A_0$  is the absorbance before exposure to  $\text{NO}_2$  and  $A_x$  is the absorbance upon exposure to  $\text{NO}_2$  for 300 s in air with 50% RH.

<sup>1</sup>H, j23mt+b, 1:30

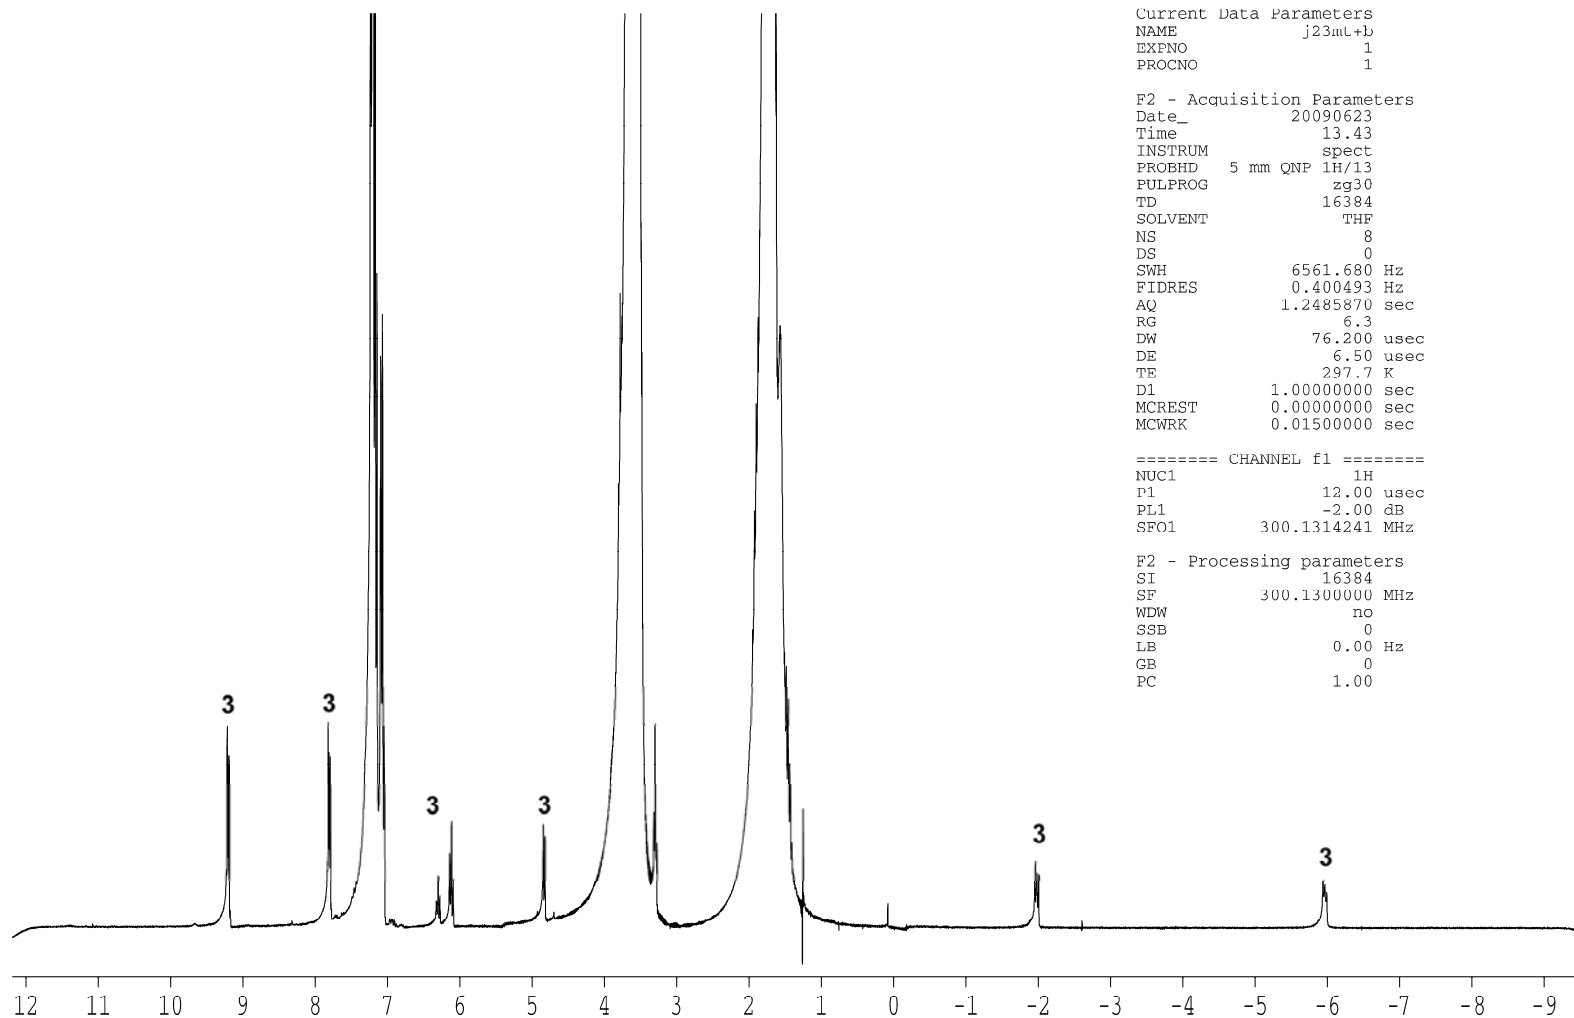

Figure 17. <sup>1</sup>H NMR of the THF cocktail based on **1**:benzylamine, in the ratio 1:30. Complex **3** can be clearly identified among THF and benzylamine signals.

<sup>1</sup>H, j23mt+b+f, 1:30:15

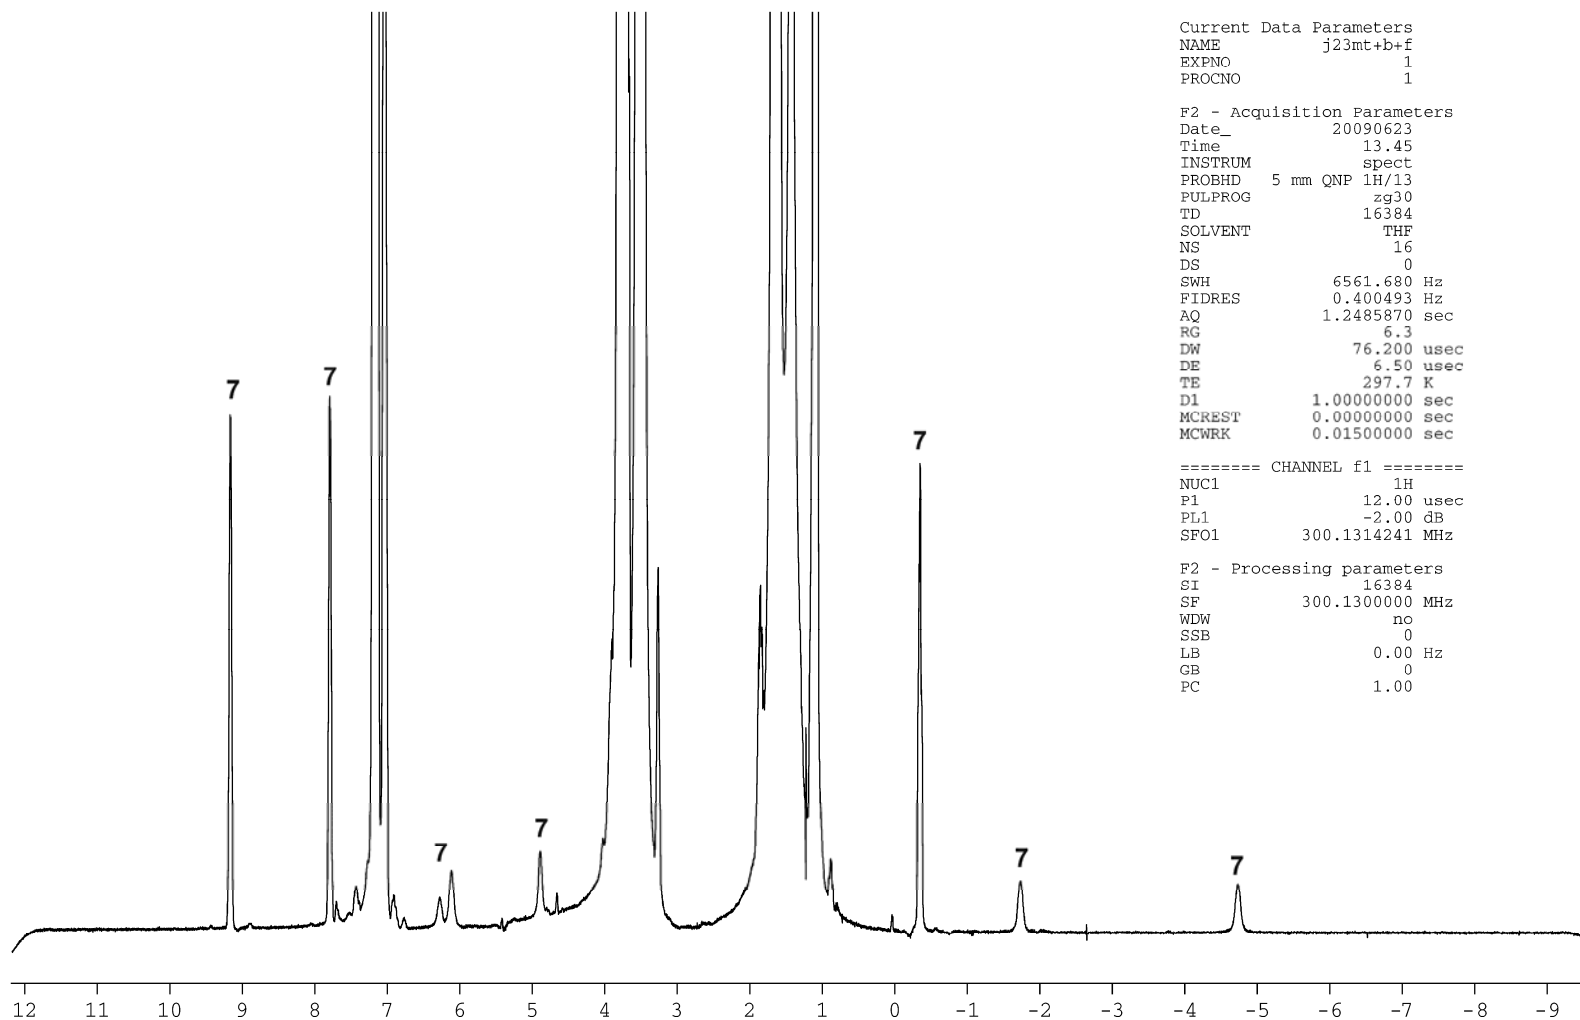

Figure 18. <sup>1</sup>H NMR of the THF cocktail based on **1**:benzylamine:P(EtO)<sub>3</sub>, in the ratio 1:30:15. Complex **7** can be clearly identified among THF, benzylamine, and triethylphosphite signals.

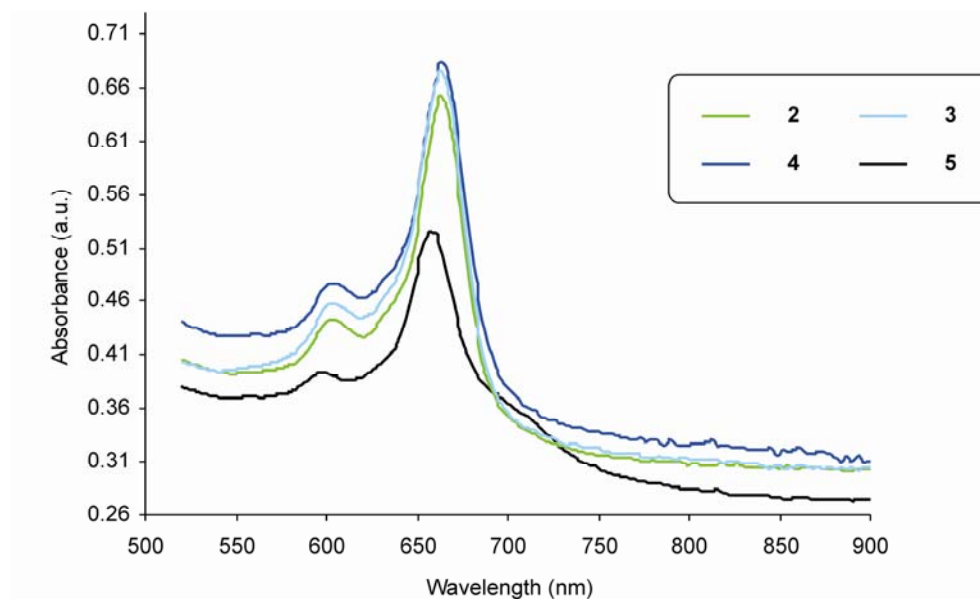

Figure 19. Absorption spectra of complexes **2-5** (FePc:amine molar ratio 1:30) immobilized into AP200/19 in air with 50% RH and at flow-rate of 200 mL min<sup>-1</sup>.

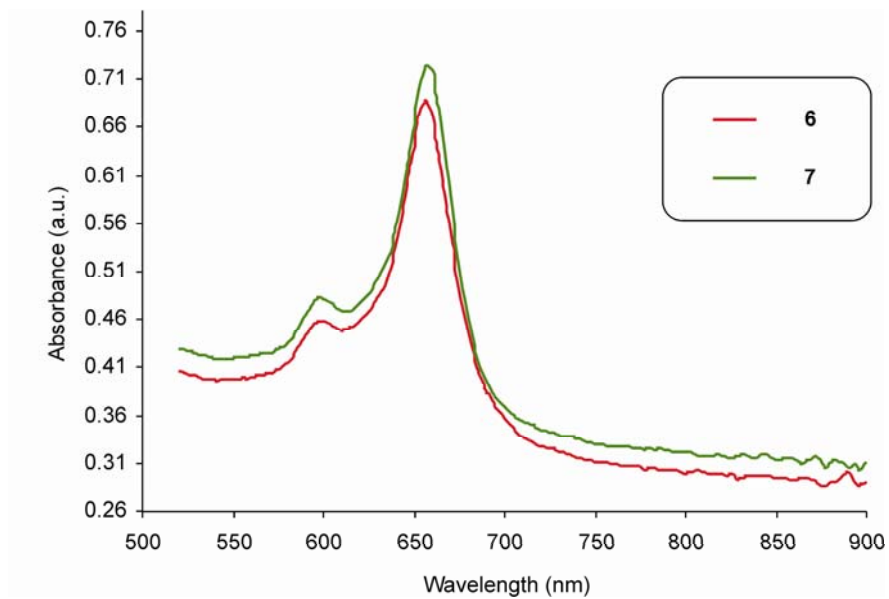

Figure 20. Absorption spectra of the cocktails for complexes **6** and **7** formation (FePc:amine:P(OEt)<sub>3</sub> molar ratio 1:30:15) immobilized into AP200/19 in air with 50% RH and at flow-rate of 200 mL min<sup>-1</sup>.

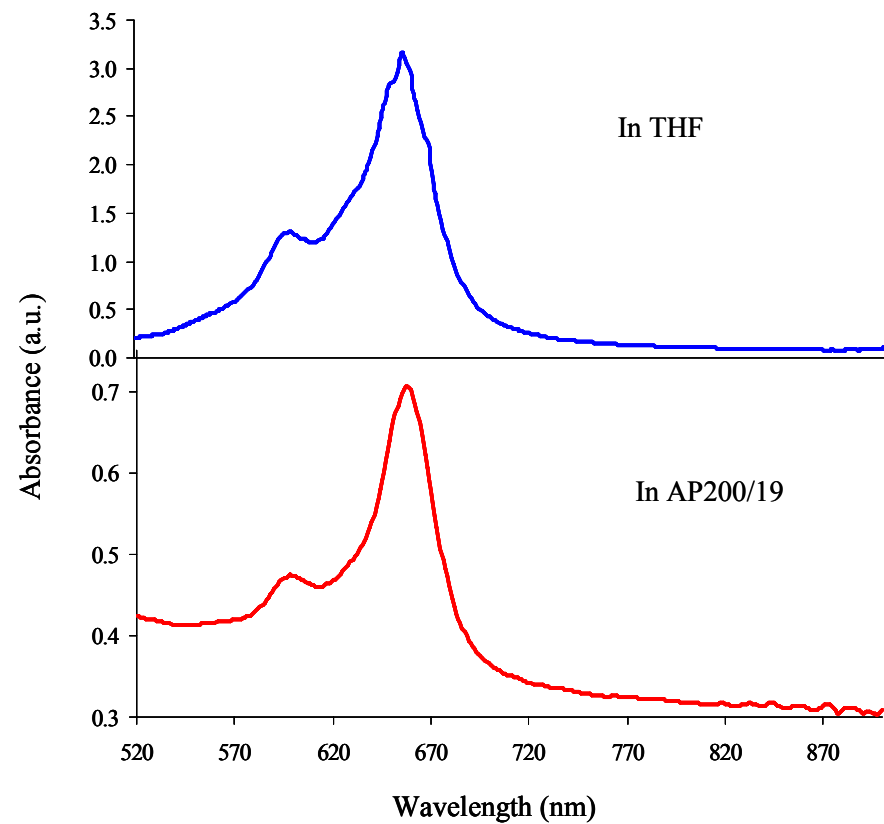

Figure 21. Absorption spectra of complex **7** in THF solution (top) and incorporated into AP200/19 (bottom).
